# Supplementary material for: Hydrotropic Root Behavior in Water-Saving Cultivation: A High-Resolution Monitoring Study of Soil Water Dynamics
Source: Research Square preprint supplement (doi:10.21203/rs.3.rs-526684/v1), 2021-05-28
Supplement: Supplementary file 1 [file 79690d329a70197bcdd7a386.xlsx]

## Sheet: Soil moisture data for FFT 
Date	No.	water source	H1(3cm)	H2(6cm)	H3(12cm)	V1(3cm)	V2(6cm)	V3(17cm)
2016-12-25 08:00:00	1	13.715	11.39	5.925	5.185	9.9	5.945	3.465
2016-12-25 08:05:00	2	14.31	11.39	5.925	5.185	9.9	5.945	3.465
2016-12-25 08:10:00	3	14.905	11.475	5.925	5.185	9.9	5.945	3.465
2016-12-25 08:15:00	4	14.99	11.475	5.925	5.185	9.9	5.945	3.465
2016-12-25 08:20:00	5	15.075	11.475	5.925	5.185	9.9	5.945	3.465
2016-12-25 08:25:00	6	15.075	11.475	5.925	5.185	9.9	5.945	3.465
2016-12-25 08:30:00	7	15.075	11.475	5.925	5.185	9.9	5.945	3.465
2016-12-25 08:35:00	8	15.075	11.475	5.925	5.27	9.9	5.945	3.465
2016-12-25 08:40:00	9	15.075	11.475	5.925	5.27	9.9	5.945	3.465
2016-12-25 08:45:00	10	14.99	11.39	5.925	5.27	9.9	5.945	3.465
2016-12-25 08:50:00	11	14.99	11.39	5.925	5.27	9.9	5.945	3.465
2016-12-25 08:55:00	12	14.905	11.39	5.925	5.27	9.9	5.945	3.465
2016-12-25 09:00:00	13	14.905	11.39	5.925	5.27	9.9	5.945	3.465
2016-12-25 09:05:00	14	14.82	11.39	5.925	5.27	9.9	5.945	3.465
2016-12-25 09:10:00	15	14.82	11.39	5.925	5.27	9.815	5.945	3.465
2016-12-25 09:15:00	16	14.735	11.39	5.925	5.27	9.9	5.945	3.465
2016-12-25 09:20:00	17	14.735	11.39	5.925	5.27	9.815	5.945	3.465
2016-12-25 09:25:00	18	14.65	11.475	5.925	5.27	9.815	5.945	3.465
2016-12-25 09:30:00	19	14.65	11.39	5.925	5.27	9.815	5.945	3.465
2016-12-25 09:35:00	20	14.565	11.39	5.925	5.27	9.815	5.945	3.465
2016-12-25 09:40:00	21	14.565	11.39	5.925	5.27	9.9	5.945	3.465
2016-12-25 09:45:00	22	14.565	11.39	5.925	5.27	9.9	5.945	3.55
2016-12-25 09:50:00	23	14.48	11.475	6.01	5.27	9.9	5.945	3.55
2016-12-25 09:55:00	24	14.48	11.475	6.01	5.27	9.9	5.945	3.55
2016-12-25 10:00:00	25	14.48	11.475	6.01	5.355	9.9	5.945	3.55
2016-12-25 10:05:00	26	14.395	11.475	6.01	5.355	9.9	5.945	3.55
2016-12-25 10:10:00	27	14.31	11.475	6.01	5.355	9.9	5.945	3.55
2016-12-25 10:15:00	28	14.31	11.475	6.01	5.355	9.9	5.945	3.55
2016-12-25 10:20:00	29	14.31	11.475	6.01	5.355	9.9	5.945	3.55
2016-12-25 10:25:00	30	14.31	11.475	6.01	5.355	9.9	5.945	3.55
2016-12-25 10:30:00	31	14.31	11.475	6.01	5.355	9.9	5.945	3.55
2016-12-25 10:35:00	32	14.735	11.475	6.01	5.355	9.9	5.945	3.55
2016-12-25 10:40:00	33	15.415	11.475	6.01	5.355	9.9	5.945	3.55
2016-12-25 10:45:00	34	15.67	11.56	6.01	5.355	9.9	5.945	3.55
2016-12-25 10:50:00	35	15.67	11.56	6.01	5.355	9.9	5.945	3.55
2016-12-25 10:55:00	36	15.67	11.56	6.01	5.355	9.9	5.945	3.55
2016-12-25 11:00:00	37	15.67	11.56	6.01	5.355	9.9	5.945	3.55
2016-12-25 11:05:00	38	15.67	11.56	6.01	5.355	9.9	5.945	3.55
2016-12-25 11:10:00	39	15.67	11.56	6.095	5.355	9.9	5.945	3.55
2016-12-25 11:15:00	40	15.67	11.56	6.095	5.355	9.985	5.945	3.55
2016-12-25 11:20:00	41	15.67	11.56	6.095	5.355	9.985	5.945	3.55
2016-12-25 11:25:00	42	15.585	11.56	6.095	5.355	9.985	6.03	3.55
2016-12-25 11:30:00	43	15.585	11.56	6.095	5.355	9.985	6.03	3.55
2016-12-25 11:35:00	44	15.5	11.56	6.095	5.355	9.985	6.03	3.55
2016-12-25 11:40:00	45	15.5	11.56	6.095	5.355	9.985	6.03	3.55
2016-12-25 11:45:00	46	15.415	11.56	6.095	5.355	9.985	6.03	3.55
2016-12-25 11:50:00	47	15.33	11.56	6.095	5.355	9.985	6.03	3.635
2016-12-25 11:55:00	48	15.245	11.645	6.095	5.355	9.985	6.03	3.635
2016-12-25 12:00:00	49	15.245	11.645	6.095	5.355	9.985	6.03	3.635
2016-12-25 12:05:00	50	15.16	11.645	6.095	5.355	9.985	6.03	3.635
2016-12-25 12:10:00	51	15.075	11.645	6.095	5.355	9.985	6.03	3.635
2016-12-25 12:15:00	52	15.075	11.645	6.095	5.355	9.985	6.03	3.635
2016-12-25 12:20:00	53	14.99	11.645	6.095	5.355	10.07	6.03	3.635
2016-12-25 12:25:00	54	14.99	11.645	6.095	5.355	10.07	6.03	3.635
2016-12-25 12:30:00	55	14.905	11.645	6.095	5.355	10.07	6.03	3.635
2016-12-25 12:35:00	56	14.82	11.645	6.18	5.355	10.07	6.03	3.635
2016-12-25 12:40:00	57	14.735	11.645	6.18	5.355	10.07	6.03	3.635
2016-12-25 12:45:00	58	14.735	11.645	6.18	5.355	10.07	6.03	3.635
2016-12-25 12:50:00	59	14.65	11.645	6.18	5.355	10.07	6.03	3.635
2016-12-25 12:55:00	60	14.65	11.645	6.18	5.355	10.07	6.115	3.635
2016-12-25 13:00:00	61	14.565	11.645	6.18	5.355	10.07	6.115	3.635
2016-12-25 13:05:00	62	14.99	11.645	6.18	5.355	10.07	6.115	3.635
2016-12-25 13:10:00	63	15.67	11.73	6.18	5.355	10.07	6.115	3.635
2016-12-25 13:15:00	64	15.925	11.73	6.18	5.355	10.07	6.115	3.635
2016-12-25 13:20:00	65	16.01	11.73	6.18	5.355	10.07	6.115	3.635
2016-12-25 13:25:00	66	16.01	11.73	6.18	5.355	10.07	6.115	3.635
2016-12-25 13:30:00	67	16.01	11.73	6.18	5.355	10.07	6.115	3.635
2016-12-25 13:35:00	68	16.01	11.73	6.18	5.355	10.07	6.115	3.635
2016-12-25 13:40:00	69	15.925	11.73	6.18	5.355	10.07	6.115	3.635
2016-12-25 13:45:00	70	15.925	11.73	6.18	5.355	10.07	6.115	3.635
2016-12-25 13:50:00	71	15.84	11.73	6.095	5.27	10.07	6.115	3.635
2016-12-25 13:55:00	72	15.755	11.73	6.095	5.27	10.07	6.115	3.635
2016-12-25 14:00:00	73	15.755	11.73	6.18	5.27	10.07	6.115	3.72
2016-12-25 14:05:00	74	15.67	11.73	6.18	5.355	10.07	6.115	3.635
2016-12-25 14:10:00	75	15.67	11.73	6.18	5.27	10.07	6.115	3.72
2016-12-25 14:15:00	76	15.585	11.73	6.18	5.355	10.155	6.115	3.72
2016-12-25 14:20:00	77	15.5	11.73	6.18	5.355	10.155	6.115	3.635
2016-12-25 14:25:00	78	15.415	11.73	6.18	5.355	10.155	6.115	3.635
2016-12-25 14:30:00	79	15.415	11.73	6.18	5.355	10.155	6.115	3.635
2016-12-25 14:35:00	80	15.33	11.73	6.18	5.355	10.155	6.115	3.635
2016-12-25 14:40:00	81	15.245	11.73	6.18	5.355	10.155	6.115	3.635
2016-12-25 14:45:00	82	15.16	11.73	6.18	5.355	10.155	6.115	3.635
2016-12-25 14:50:00	83	15.075	11.73	6.18	5.355	10.155	6.115	3.635
2016-12-25 14:55:00	84	15.075	11.73	6.18	5.355	10.155	6.2	3.635
2016-12-25 15:00:00	85	14.99	11.73	6.18	5.355	10.155	6.2	3.635
2016-12-25 15:05:00	86	14.99	11.73	6.18	5.355	10.155	6.2	3.635
2016-12-25 15:10:00	87	14.905	11.73	6.18	5.355	10.155	6.2	3.635
2016-12-25 15:15:00	88	14.905	11.73	6.18	5.355	10.155	6.2	3.635
2016-12-25 15:20:00	89	14.82	11.73	6.18	5.355	10.155	6.2	3.635
2016-12-25 15:25:00	90	14.82	11.73	6.18	5.355	10.155	6.2	3.635
2016-12-25 15:30:00	91	14.735	11.73	6.18	5.355	10.155	6.2	3.635
2016-12-25 15:35:00	92	15.075	11.73	6.18	5.355	10.155	6.2	3.72
2016-12-25 15:40:00	93	15.755	11.815	6.18	5.355	10.155	6.2	3.635
2016-12-25 15:45:00	94	16.01	11.815	6.18	5.355	10.155	6.2	3.635
2016-12-25 15:50:00	95	16.095	11.815	6.18	5.355	10.155	6.2	3.635
2016-12-25 15:55:00	96	16.18	11.815	6.18	5.355	10.155	6.2	3.72
2016-12-25 16:00:00	97	16.18	11.815	6.18	5.355	10.155	6.2	3.635
2016-12-25 16:05:00	98	16.18	11.815	6.18	5.355	10.155	6.2	3.72
2016-12-25 16:10:00	99	16.095	11.815	6.18	5.355	10.155	6.2	3.72
2016-12-25 16:15:00	100	16.095	11.815	6.18	5.355	10.155	6.2	3.72
2016-12-25 16:20:00	101	16.01	11.815	6.18	5.355	10.155	6.2	3.72
2016-12-25 16:25:00	102	16.01	11.815	6.18	5.355	10.155	6.2	3.72
2016-12-25 16:30:00	103	15.925	11.815	6.265	5.355	10.155	6.2	3.72
2016-12-25 16:35:00	104	15.84	11.815	6.265	5.355	10.155	6.2	3.72
2016-12-25 16:40:00	105	15.755	11.815	6.265	5.355	10.155	6.2	3.72
2016-12-25 16:45:00	106	15.67	11.815	6.265	5.355	10.155	6.2	3.72
2016-12-25 16:50:00	107	15.67	11.815	6.265	5.355	10.155	6.2	3.72
2016-12-25 16:55:00	108	15.585	11.815	6.265	5.355	10.155	6.2	3.72
2016-12-25 17:00:00	109	15.5	11.815	6.265	5.355	10.155	6.2	3.72
2016-12-25 17:05:00	110	15.415	11.815	6.265	5.355	10.155	6.2	3.72
2016-12-25 17:10:00	111	15.33	11.815	6.265	5.355	10.155	6.2	3.72
2016-12-25 17:15:00	112	15.245	11.815	6.265	5.355	10.24	6.2	3.72
2016-12-25 17:20:00	113	15.245	11.815	6.265	5.355	10.24	6.2	3.72
2016-12-25 17:25:00	114	15.16	11.815	6.265	5.355	10.24	6.2	3.72
2016-12-25 17:30:00	115	15.075	11.815	6.265	5.355	10.24	6.2	3.72
2016-12-25 17:35:00	116	15.075	11.815	6.265	5.355	10.24	6.2	3.72
2016-12-25 17:40:00	117	14.99	11.815	6.265	5.355	10.24	6.285	3.72
2016-12-25 17:45:00	118	14.905	11.815	6.265	5.355	10.24	6.2	3.72
2016-12-25 17:50:00	119	14.905	11.815	6.265	5.355	10.24	6.2	3.72
2016-12-25 17:55:00	120	14.82	11.815	6.265	5.355	10.24	6.285	3.72
2016-12-25 18:00:00	121	14.735	11.815	6.265	5.355	10.24	6.285	3.72
2016-12-25 18:05:00	122	15.075	11.815	6.265	5.355	10.24	6.285	3.72
2016-12-25 18:10:00	123	15.755	11.9	6.265	5.355	10.24	6.285	3.72
2016-12-25 18:15:00	124	16.095	11.9	6.265	5.355	10.24	6.285	3.72
2016-12-25 18:20:00	125	16.265	11.9	6.265	5.355	10.24	6.285	3.72
2016-12-25 18:25:00	126	16.265	11.9	6.265	5.355	10.24	6.285	3.72
2016-12-25 18:30:00	127	16.265	11.9	6.265	5.355	10.24	6.285	3.72
2016-12-25 18:35:00	128	16.265	11.9	6.265	5.355	10.24	6.285	3.72
2016-12-25 18:40:00	129	16.265	11.9	6.265	5.355	10.24	6.285	3.72
2016-12-25 18:45:00	130	16.265	11.9	6.265	5.355	10.24	6.285	3.72
2016-12-25 18:50:00	131	16.18	11.9	6.265	5.355	10.24	6.285	3.72
2016-12-25 18:55:00	132	16.095	11.9	6.265	5.355	10.24	6.285	3.72
2016-12-25 19:00:00	133	16.095	11.9	6.265	5.355	10.24	6.285	3.72
2016-12-25 19:05:00	134	16.01	11.9	6.265	5.355	10.24	6.285	3.72
2016-12-25 19:10:00	135	15.925	11.9	6.265	5.355	10.24	6.285	3.72
2016-12-25 19:15:00	136	15.925	11.9	6.265	5.355	10.24	6.285	3.72
2016-12-25 19:20:00	137	15.84	11.9	6.265	5.355	10.24	6.285	3.72
2016-12-25 19:25:00	138	15.755	11.9	6.265	5.355	10.24	6.285	3.72
2016-12-25 19:30:00	139	15.755	11.9	6.265	5.355	10.24	6.285	3.72
2016-12-25 19:35:00	140	15.67	11.9	6.265	5.355	10.24	6.285	3.72
2016-12-25 19:40:00	141	15.585	11.9	6.265	5.355	10.24	6.285	3.72
2016-12-25 19:45:00	142	15.5	11.9	6.265	5.355	10.24	6.285	3.72
2016-12-25 19:50:00	143	15.415	11.9	6.265	5.355	10.24	6.285	3.72
2016-12-25 19:55:00	144	15.415	11.9	6.265	5.355	10.24	6.285	3.72
2016-12-25 20:00:00	145	15.33	11.9	6.265	5.355	10.24	6.285	3.72
2016-12-25 20:05:00	146	15.245	11.9	6.265	5.355	10.24	6.285	3.72
2016-12-25 20:10:00	147	15.245	11.9	6.265	5.355	10.24	6.285	3.72
2016-12-25 20:15:00	148	15.16	11.9	6.265	5.355	10.24	6.285	3.72
2016-12-25 20:20:00	149	15.16	11.9	6.265	5.355	10.24	6.285	3.72
2016-12-25 20:25:00	150	15.075	11.9	6.265	5.355	10.24	6.285	3.72
2016-12-25 20:30:00	151	15.075	11.9	6.265	5.355	10.24	6.285	3.72
2016-12-25 20:35:00	152	15.245	11.9	6.265	5.355	10.24	6.285	3.72
2016-12-25 20:40:00	153	15.84	11.9	6.265	5.355	10.24	6.285	3.72
2016-12-25 20:45:00	154	16.265	11.9	6.265	5.355	10.24	6.285	3.72
2016-12-25 20:50:00	155	16.52	11.9	6.265	5.355	10.24	6.285	3.72
2016-12-25 20:55:00	156	16.605	11.9	6.265	5.355	10.24	6.285	3.72
2016-12-25 21:00:00	157	16.69	11.9	6.265	5.355	10.24	6.285	3.72
2016-12-25 21:05:00	158	16.69	11.9	6.265	5.355	10.24	6.285	3.72
2016-12-25 21:10:00	159	16.69	11.9	6.265	5.355	10.24	6.285	3.72
2016-12-25 21:15:00	160	16.69	11.9	6.265	5.355	10.24	6.285	3.72
2016-12-25 21:20:00	161	16.69	11.9	6.265	5.355	10.24	6.285	3.72
2016-12-25 21:25:00	162	16.69	11.9	6.265	5.355	10.24	6.285	3.72
2016-12-25 21:30:00	163	16.605	11.9	6.265	5.355	10.24	6.285	3.72
2016-12-25 21:35:00	164	16.605	11.9	6.265	5.355	10.24	6.285	3.72
2016-12-25 21:40:00	165	16.52	11.9	6.265	5.355	10.24	6.285	3.72
2016-12-25 21:45:00	166	16.435	11.9	6.265	5.355	10.24	6.285	3.72
2016-12-25 21:50:00	167	16.435	11.9	6.265	5.355	10.24	6.285	3.72
2016-12-25 21:55:00	168	16.35	11.9	6.265	5.355	10.24	6.285	3.72
2016-12-25 22:00:00	169	16.35	11.9	6.265	5.355	10.24	6.285	3.72
2016-12-25 22:05:00	170	16.265	11.9	6.265	5.355	10.24	6.285	3.72
2016-12-25 22:10:00	171	16.18	11.9	6.265	5.355	10.24	6.285	3.72
2016-12-25 22:15:00	172	16.18	11.9	6.265	5.355	10.24	6.285	3.72
2016-12-25 22:20:00	173	16.095	11.985	6.265	5.355	10.325	6.285	3.72
2016-12-25 22:25:00	174	16.095	11.9	6.265	5.355	10.325	6.37	3.72
2016-12-25 22:30:00	175	16.01	11.9	6.265	5.355	10.325	6.37	3.72
2016-12-25 22:35:00	176	16.01	11.985	6.265	5.355	10.325	6.37	3.72
2016-12-25 22:40:00	177	16.01	11.9	6.35	5.355	10.325	6.37	3.72
2016-12-25 22:45:00	178	16.01	11.985	6.265	5.355	10.325	6.37	3.72
2016-12-25 22:50:00	179	16.01	11.985	6.265	5.355	10.325	6.37	3.72
2016-12-25 22:55:00	180	15.925	11.985	6.35	5.355	10.325	6.37	3.72
2016-12-25 23:00:00	181	15.925	11.985	6.265	5.27	10.325	6.37	3.72
2016-12-25 23:05:00	182	15.925	11.9	6.265	5.27	10.325	6.37	3.72
2016-12-25 23:10:00	183	15.84	11.9	6.265	5.27	10.325	6.37	3.72
2016-12-25 23:15:00	184	15.84	11.9	6.265	5.27	10.325	6.37	3.72
2016-12-25 23:20:00	185	15.84	11.9	6.265	5.27	10.325	6.37	3.635
2016-12-25 23:25:00	186	15.755	11.9	6.265	5.27	10.325	6.37	3.635
2016-12-25 23:30:00	187	15.755	11.9	6.265	5.27	10.325	6.37	3.635
2016-12-25 23:35:00	188	15.755	11.9	6.265	5.27	10.325	6.37	3.635
2016-12-25 23:40:00	189	15.67	11.9	6.265	5.27	10.325	6.37	3.635
2016-12-25 23:45:00	190	15.67	11.9	6.265	5.27	10.325	6.285	3.635
2016-12-25 23:50:00	191	15.67	11.9	6.265	5.27	10.24	6.285	3.635
2016-12-25 23:55:00	192	15.585	11.9	6.265	5.27	10.24	6.285	3.635
2016-12-26	193	15.585	11.9	6.18	5.27	10.24	6.285	3.635
2016-12-26 00:05:00	194	15.5	11.9	6.18	5.27	10.24	6.285	3.635
2016-12-26 00:10:00	195	15.5	11.9	6.18	5.27	10.24	6.285	3.635
2016-12-26 00:15:00	196	15.5	11.9	6.18	5.27	10.24	6.285	3.635
2016-12-26 00:20:00	197	15.415	11.815	6.18	5.27	10.24	6.285	3.635
2016-12-26 00:25:00	198	15.415	11.815	6.18	5.27	10.24	6.285	3.635
2016-12-26 00:30:00	199	15.33	11.815	6.18	5.27	10.24	6.285	3.635
2016-12-26 00:35:00	200	15.33	11.815	6.18	5.27	10.24	6.285	3.635
2016-12-26 00:40:00	201	15.33	11.815	6.18	5.27	10.24	6.285	3.635
2016-12-26 00:45:00	202	15.33	11.815	6.18	5.27	10.24	6.285	3.635
2016-12-26 00:50:00	203	15.245	11.815	6.18	5.27	10.24	6.285	3.635
2016-12-26 00:55:00	204	15.245	11.815	6.18	5.27	10.24	6.285	3.635
2016-12-26 01:00:00	205	15.245	11.815	6.18	5.27	10.155	6.285	3.635
2016-12-26 01:05:00	206	15.245	11.815	6.18	5.27	10.155	6.285	3.635
2016-12-26 01:10:00	207	15.16	11.815	6.095	5.27	10.155	6.285	3.635
2016-12-26 01:15:00	208	15.16	11.73	6.095	5.27	10.155	6.2	3.635
2016-12-26 01:20:00	209	15.16	11.73	6.095	5.27	10.155	6.2	3.635
2016-12-26 01:25:00	210	15.075	11.73	6.095	5.27	10.155	6.2	3.55
2016-12-26 01:30:00	211	15.075	11.73	6.095	5.27	10.155	6.2	3.55
2016-12-26 01:35:00	212	15.075	11.73	6.095	5.27	10.155	6.2	3.55
2016-12-26 01:40:00	213	14.99	11.73	6.095	5.27	10.155	6.2	3.55
2016-12-26 01:45:00	214	14.99	11.73	6.095	5.27	10.155	6.2	3.55
2016-12-26 01:50:00	215	14.99	11.73	6.095	5.27	10.155	6.2	3.55
2016-12-26 01:55:00	216	14.99	11.73	6.095	5.27	10.155	6.2	3.55
2016-12-26 02:00:00	217	14.905	11.73	6.095	5.185	10.155	6.2	3.55
2016-12-26 02:05:00	218	14.905	11.73	6.095	5.27	10.155	6.2	3.55
2016-12-26 02:10:00	219	14.905	11.73	6.095	5.185	10.155	6.2	3.55
2016-12-26 02:15:00	220	14.905	11.645	6.095	5.185	10.07	6.2	3.55
2016-12-26 02:20:00	221	14.82	11.645	6.095	5.185	10.155	6.2	3.55
2016-12-26 02:25:00	222	14.82	11.645	6.095	5.185	10.07	6.115	3.55
2016-12-26 02:30:00	223	14.82	11.645	6.095	5.185	10.07	6.115	3.55
2016-12-26 02:35:00	224	14.82	11.645	6.095	5.185	10.07	6.115	3.55
2016-12-26 02:40:00	225	14.735	11.645	6.095	5.185	10.07	6.115	3.55
2016-12-26 02:45:00	226	14.735	11.645	6.095	5.185	10.07	6.115	3.55
2016-12-26 02:50:00	227	14.735	11.645	6.095	5.185	10.07	6.115	3.55
2016-12-26 02:55:00	228	14.735	11.645	6.01	5.185	10.07	6.115	3.55
2016-12-26 03:00:00	229	14.65	11.645	6.01	5.185	10.07	6.115	3.55
2016-12-26 03:05:00	230	14.65	11.645	6.01	5.185	10.07	6.115	3.55
2016-12-26 03:10:00	231	14.65	11.645	6.01	5.185	10.07	6.115	3.55
2016-12-26 03:15:00	232	14.65	11.56	6.01	5.185	10.07	6.115	3.55
2016-12-26 03:20:00	233	14.65	11.56	6.01	5.185	10.07	6.115	3.55
2016-12-26 03:25:00	234	14.565	11.56	6.01	5.185	10.07	6.115	3.55
2016-12-26 03:30:00	235	14.565	11.56	6.01	5.185	10.07	6.115	3.55
2016-12-26 03:35:00	236	14.565	11.56	6.01	5.185	10.07	6.115	3.55
2016-12-26 03:40:00	237	14.565	11.56	6.01	5.185	10.07	6.115	3.55
2016-12-26 03:45:00	238	14.565	11.56	6.01	5.185	10.07	6.115	3.55
2016-12-26 03:50:00	239	14.48	11.56	6.01	5.185	10.07	6.115	3.55
2016-12-26 03:55:00	240	14.48	11.56	6.01	5.185	9.985	6.03	3.55
2016-12-26 04:00:00	241	14.48	11.56	6.01	5.185	9.985	6.03	3.55
2016-12-26 04:05:00	242	14.48	11.56	6.01	5.185	9.985	6.03	3.55
2016-12-26 04:10:00	243	14.48	11.56	6.01	5.185	9.985	6.03	3.55
2016-12-26 04:15:00	244	14.395	11.56	6.01	5.185	9.985	6.03	3.55
2016-12-26 04:20:00	245	14.395	11.56	6.01	5.185	9.985	6.03	3.55
2016-12-26 04:25:00	246	14.395	11.475	6.01	5.185	9.985	6.03	3.55
2016-12-26 04:30:00	247	14.395	11.475	6.01	5.185	9.985	6.03	3.55
2016-12-26 04:35:00	248	14.395	11.475	6.01	5.185	9.985	6.03	3.55
2016-12-26 04:40:00	249	14.31	11.475	6.01	5.185	9.985	6.03	3.55
2016-12-26 04:45:00	250	14.31	11.475	6.01	5.185	9.985	6.03	3.55
2016-12-26 04:50:00	251	14.31	11.475	6.01	5.185	9.985	6.03	3.55
2016-12-26 04:55:00	252	14.31	11.475	6.01	5.185	9.985	6.03	3.55
2016-12-26 05:00:00	253	14.31	11.475	6.01	5.185	9.985	6.03	3.465
2016-12-26 05:05:00	254	14.31	11.475	6.01	5.185	9.985	6.03	3.55
2016-12-26 05:10:00	255	14.31	11.475	6.01	5.185	9.985	6.03	3.465
2016-12-26 05:15:00	256	14.225	11.475	6.01	5.185	9.985	6.03	3.465
2016-12-26 05:20:00	257	14.225	11.475	6.01	5.185	9.985	6.03	3.465
2016-12-26 05:25:00	258	14.225	11.475	6.01	5.185	9.985	6.03	3.465
2016-12-26 05:30:00	259	14.225	11.475	6.01	5.185	9.985	6.03	3.465
2016-12-26 05:35:00	260	14.225	11.475	5.925	5.185	9.985	6.03	3.465
2016-12-26 05:40:00	261	14.225	11.39	5.925	5.185	9.985	6.03	3.465
2016-12-26 05:45:00	262	14.14	11.475	5.925	5.185	9.985	6.03	3.465
2016-12-26 05:50:00	263	14.14	11.39	5.925	5.185	9.985	6.03	3.465
2016-12-26 05:55:00	264	14.14	11.39	5.925	5.185	9.9	6.03	3.465
2016-12-26 06:00:00	265	14.14	11.39	5.925	5.185	9.9	6.03	3.465
2016-12-26 06:05:00	266	14.14	11.39	5.925	5.185	9.9	6.03	3.465
2016-12-26 06:10:00	267	14.055	11.39	5.925	5.185	9.9	5.945	3.465
2016-12-26 06:15:00	268	14.14	11.39	5.925	5.185	9.9	6.03	3.465
2016-12-26 06:20:00	269	14.055	11.39	5.925	5.185	9.9	5.945	3.465
2016-12-26 06:25:00	270	14.055	11.39	5.925	5.185	9.9	5.945	3.465
2016-12-26 06:30:00	271	14.055	11.39	5.925	5.185	9.9	5.945	3.465
2016-12-26 06:35:00	272	14.055	11.39	5.925	5.185	9.9	5.945	3.465
2016-12-26 06:40:00	273	14.055	11.39	5.925	5.185	9.9	5.945	3.465
2016-12-26 06:45:00	274	13.97	11.39	5.925	5.185	9.9	5.945	3.465
2016-12-26 06:50:00	275	13.97	11.39	5.925	5.185	9.9	5.945	3.465
2016-12-26 06:55:00	276	13.97	11.39	5.925	5.185	9.9	5.945	3.465
2016-12-26 07:00:00	277	13.97	11.39	5.925	5.185	9.9	5.945	3.465
2016-12-26 07:05:00	278	13.97	11.39	5.925	5.185	9.9	5.945	3.465
2016-12-26 07:10:00	279	13.97	11.39	5.925	5.185	9.9	5.945	3.465
2016-12-26 07:15:00	280	13.885	11.39	5.925	5.185	9.9	5.945	3.465
2016-12-26 07:20:00	281	13.885	11.39	5.925	5.185	9.9	5.945	3.465
2016-12-26 07:25:00	282	13.885	11.39	5.925	5.185	9.9	5.945	3.465
2016-12-26 07:30:00	283	13.885	11.305	5.925	5.185	9.9	5.945	3.465
2016-12-26 07:35:00	284	13.885	11.39	5.925	5.185	9.9	5.945	3.465
2016-12-26 07:40:00	285	13.885	11.305	5.925	5.185	9.9	5.945	3.465
2016-12-26 07:45:00	286	13.8	11.305	5.925	5.185	9.9	5.945	3.465
2016-12-26 07:50:00	287	13.8	11.305	5.925	5.185	9.9	5.945	3.465
2016-12-26 07:55:00	288	13.8	11.305	5.925	5.185	9.9	5.945	3.465
2016-12-26 08:00:00	289	13.8	11.305	5.925	5.185	9.9	5.945	3.465
2016-12-26 08:05:00	290	14.14	11.305	5.925	5.185	9.9	5.945	3.465
2016-12-26 08:10:00	291	14.82	11.305	5.925	5.185	9.9	5.945	3.465
2016-12-26 08:15:00	292	15.075	11.39	5.925	5.185	9.9	5.945	3.465
2016-12-26 08:20:00	293	15.16	11.39	5.925	5.185	9.815	5.945	3.465
2016-12-26 08:25:00	294	15.16	11.305	5.84	5.185	9.815	5.945	3.465
2016-12-26 08:30:00	295	15.16	11.305	5.84	5.185	9.815	5.945	3.465
2016-12-26 08:35:00	296	15.16	11.305	5.84	5.27	9.815	5.945	3.465
2016-12-26 08:40:00	297	15.16	11.305	5.84	5.27	9.815	5.945	3.465
2016-12-26 08:45:00	298	15.16	11.305	5.84	5.27	9.815	5.945	3.465
2016-12-26 08:50:00	299	15.075	11.305	5.84	5.27	9.815	5.945	3.465
2016-12-26 08:55:00	300	15.075	11.305	5.84	5.27	9.815	5.945	3.465
2016-12-26 09:00:00	301	14.99	11.305	5.84	5.27	9.815	5.86	3.465
2016-12-26 09:05:00	302	14.99	11.305	5.84	5.27	9.815	5.86	3.465
2016-12-26 09:10:00	303	14.905	11.305	5.925	5.27	9.815	5.86	3.465
2016-12-26 09:15:00	304	14.905	11.305	5.925	5.27	9.815	5.86	3.465
2016-12-26 09:20:00	305	14.82	11.39	5.925	5.27	9.815	5.86	3.465
2016-12-26 09:25:00	306	14.82	11.305	5.925	5.27	9.815	5.86	3.465
2016-12-26 09:30:00	307	14.735	11.305	5.925	5.27	9.815	5.86	3.55
2016-12-26 09:35:00	308	14.735	11.305	5.925	5.27	9.815	5.86	3.55
2016-12-26 09:40:00	309	14.735	11.305	5.925	5.27	9.815	5.86	3.55
2016-12-26 09:45:00	310	14.65	11.305	5.925	5.27	9.815	5.86	3.55
2016-12-26 09:50:00	311	14.65	11.305	5.925	5.27	9.815	5.86	3.55
2016-12-26 09:55:00	312	14.565	11.305	5.925	5.27	9.815	5.945	3.55
2016-12-26 10:00:00	313	14.565	11.39	5.925	5.355	9.815	5.945	3.55
2016-12-26 10:05:00	314	14.48	11.39	6.01	5.355	9.815	5.86	3.55
2016-12-26 10:10:00	315	14.395	11.39	5.925	5.355	9.815	5.945	3.55
2016-12-26 10:15:00	316	14.395	11.39	6.01	5.355	9.815	5.945	3.55
2016-12-26 10:20:00	317	14.395	11.39	6.01	5.355	9.815	5.945	3.55
2016-12-26 10:25:00	318	14.395	11.39	6.01	5.355	9.815	5.945	3.55
2016-12-26 10:30:00	319	14.31	11.39	6.01	5.355	9.815	5.945	3.55
2016-12-26 10:35:00	320	14.65	11.39	6.01	5.355	9.815	5.945	3.55
2016-12-26 10:40:00	321	15.245	11.39	6.01	5.355	9.815	5.945	3.55
2016-12-26 10:45:00	322	15.67	11.475	6.01	5.355	9.815	5.945	3.55
2016-12-26 10:50:00	323	15.755	11.475	6.01	5.355	9.9	5.945	3.55
2016-12-26 10:55:00	324	15.84	11.475	6.01	5.355	9.9	5.945	3.55
2016-12-26 11:00:00	325	15.84	11.475	6.01	5.355	9.9	5.945	3.55
2016-12-26 11:05:00	326	15.84	11.475	6.01	5.355	9.9	5.945	3.55
2016-12-26 11:10:00	327	15.84	11.475	6.01	5.355	9.9	5.945	3.55
2016-12-26 11:15:00	328	15.755	11.475	6.01	5.355	9.9	5.945	3.55
2016-12-26 11:20:00	329	15.755	11.475	6.01	5.355	9.9	5.945	3.55
2016-12-26 11:25:00	330	15.755	11.475	6.01	5.355	9.9	5.945	3.55
2016-12-26 11:30:00	331	15.67	11.475	6.01	5.355	9.9	5.945	3.55
2016-12-26 11:35:00	332	15.585	11.475	6.01	5.355	9.9	6.03	3.55
2016-12-26 11:40:00	333	15.585	11.475	6.01	5.355	9.9	6.03	3.55
2016-12-26 11:45:00	334	15.5	11.475	6.095	5.355	9.9	6.03	3.55
2016-12-26 11:50:00	335	15.5	11.475	6.095	5.355	9.9	6.03	3.55
2016-12-26 11:55:00	336	15.415	11.475	6.095	5.355	9.9	6.03	3.55
2016-12-26 12:00:00	337	15.33	11.475	6.095	5.355	9.9	6.03	3.55
2016-12-26 12:05:00	338	15.245	11.475	6.095	5.355	9.985	6.03	3.55
2016-12-26 12:10:00	339	15.245	11.56	6.095	5.355	9.985	6.03	3.55
2016-12-26 12:15:00	340	15.16	11.475	6.095	5.355	9.985	6.03	3.635
2016-12-26 12:20:00	341	15.075	11.475	6.095	5.355	9.985	6.03	3.635
2016-12-26 12:25:00	342	14.99	11.56	6.095	5.355	9.985	6.03	3.635
2016-12-26 12:30:00	343	14.905	11.56	6.095	5.355	9.985	6.03	3.635
2016-12-26 12:35:00	344	14.905	11.56	6.095	5.355	9.985	6.03	3.635
2016-12-26 12:40:00	345	14.82	11.56	6.095	5.355	9.985	6.03	3.635
2016-12-26 12:45:00	346	14.735	11.56	6.095	5.355	9.985	6.03	3.635
2016-12-26 12:50:00	347	14.735	11.56	6.095	5.355	9.985	6.03	3.635
2016-12-26 12:55:00	348	14.65	11.56	6.095	5.355	9.985	6.03	3.635
2016-12-26 13:00:00	349	14.565	11.56	6.095	5.355	9.985	6.115	3.635
2016-12-26 13:05:00	350	14.82	11.56	6.095	5.355	10.07	6.03	3.635
2016-12-26 13:10:00	351	15.415	11.56	6.095	5.355	10.07	6.115	3.635
2016-12-26 13:15:00	352	15.84	11.56	6.095	5.355	10.07	6.115	3.635
2016-12-26 13:20:00	353	16.01	11.645	6.095	5.355	10.07	6.115	3.635
2016-12-26 13:25:00	354	16.095	11.645	6.18	5.355	10.07	6.115	3.635
2016-12-26 13:30:00	355	16.095	11.645	6.18	5.355	10.07	6.115	3.635
2016-12-26 13:35:00	356	16.095	11.645	6.18	5.355	10.07	6.115	3.635
2016-12-26 13:40:00	357	16.01	11.645	6.18	5.355	10.07	6.115	3.635
2016-12-26 13:45:00	358	16.01	11.645	6.18	5.355	10.07	6.115	3.635
2016-12-26 13:50:00	359	15.925	11.645	6.18	5.355	10.07	6.115	3.635
2016-12-26 13:55:00	360	15.84	11.645	6.18	5.355	10.07	6.115	3.635
2016-12-26 14:00:00	361	15.84	11.645	6.18	5.355	10.07	6.115	3.635
2016-12-26 14:05:00	362	15.755	11.645	6.18	5.355	10.07	6.115	3.635
2016-12-26 14:10:00	363	15.67	11.645	6.18	5.355	10.07	6.115	3.635
2016-12-26 14:15:00	364	15.67	11.645	6.18	5.355	10.07	6.115	3.635
2016-12-26 14:20:00	365	15.5	11.645	6.18	5.355	10.07	6.115	3.635
2016-12-26 14:25:00	366	15.5	11.645	6.18	5.355	10.07	6.115	3.635
2016-12-26 14:30:00	367	15.33	11.645	6.18	5.355	10.07	6.115	3.635
2016-12-26 14:35:00	368	15.33	11.645	6.18	5.355	10.07	6.115	3.635
2016-12-26 14:40:00	369	15.245	11.645	6.18	5.355	10.07	6.115	3.635
2016-12-26 14:45:00	370	15.16	11.645	6.18	5.355	10.07	6.115	3.635
2016-12-26 14:50:00	371	15.075	11.645	6.18	5.355	10.07	6.115	3.635
2016-12-26 14:55:00	372	14.99	11.645	6.18	5.355	10.07	6.2	3.635
2016-12-26 15:00:00	373	14.99	11.645	6.18	5.355	10.155	6.2	3.635
2016-12-26 15:05:00	374	14.905	11.645	6.18	5.355	10.155	6.2	3.635
2016-12-26 15:10:00	375	14.82	11.645	6.18	5.355	10.155	6.2	3.635
2016-12-26 15:15:00	376	14.735	11.645	6.18	5.355	10.155	6.2	3.635
2016-12-26 15:20:00	377	14.735	11.645	6.18	5.355	10.155	6.2	3.635
2016-12-26 15:25:00	378	14.65	11.645	6.18	5.355	10.155	6.2	3.635
2016-12-26 15:30:00	379	14.65	11.645	6.18	5.355	10.155	6.2	3.635
2016-12-26 15:35:00	380	14.905	11.73	6.18	5.355	10.155	6.2	3.72
2016-12-26 15:40:00	381	15.415	11.73	6.18	5.355	10.155	6.2	3.635
2016-12-26 15:45:00	382	15.925	11.73	6.18	5.355	10.155	6.2	3.635
2016-12-26 15:50:00	383	16.095	11.73	6.18	5.355	10.155	6.2	3.635
2016-12-26 15:55:00	384	16.18	11.73	6.18	5.355	10.155	6.2	3.635
2016-12-26 16:00:00	385	16.18	11.73	6.18	5.355	10.155	6.2	3.635
2016-12-26 16:05:00	386	16.095	11.73	6.18	5.355	10.155	6.2	3.635
2016-12-26 16:10:00	387	16.095	11.73	6.18	5.355	10.155	6.2	3.635
2016-12-26 16:15:00	388	16.095	11.73	6.18	5.355	10.155	6.2	3.635
2016-12-26 16:20:00	389	16.01	11.73	6.18	5.355	10.155	6.2	3.635
2016-12-26 16:25:00	390	15.925	11.73	6.18	5.355	10.155	6.2	3.635
2016-12-26 16:30:00	391	15.925	11.73	6.18	5.355	10.155	6.2	3.72
2016-12-26 16:35:00	392	15.84	11.73	6.18	5.355	10.155	6.2	3.635
2016-12-26 16:40:00	393	15.755	11.73	6.265	5.355	10.155	6.2	3.635
2016-12-26 16:45:00	394	15.67	11.73	6.265	5.355	10.155	6.2	3.72
2016-12-26 16:50:00	395	15.585	11.73	6.18	5.355	10.155	6.2	3.72
2016-12-26 16:55:00	396	15.5	11.73	6.18	5.355	10.155	6.2	3.72
2016-12-26 17:00:00	397	15.415	11.73	6.18	5.355	10.155	6.2	3.72
2016-12-26 17:05:00	398	15.33	11.73	6.265	5.355	10.155	6.2	3.72
2016-12-26 17:10:00	399	15.33	11.73	6.18	5.355	10.155	6.2	3.72
2016-12-26 17:15:00	400	15.245	11.73	6.18	5.355	10.155	6.2	3.72
2016-12-26 17:20:00	401	15.16	11.73	6.265	5.355	10.155	6.2	3.72
2016-12-26 17:25:00	402	15.075	11.73	6.18	5.355	10.155	6.2	3.72
2016-12-26 17:30:00	403	14.99	11.73	6.265	5.355	10.155	6.285	3.72
2016-12-26 17:35:00	404	14.99	11.73	6.265	5.355	10.155	6.285	3.72
2016-12-26 17:40:00	405	14.905	11.73	6.18	5.355	10.155	6.2	3.72
2016-12-26 17:45:00	406	14.82	11.73	6.265	5.355	10.155	6.285	3.72
2016-12-26 17:50:00	407	14.735	11.73	6.265	5.355	10.155	6.285	3.72
2016-12-26 17:55:00	408	14.735	11.73	6.265	5.355	10.155	6.285	3.72
2016-12-26 18:00:00	409	14.65	11.73	6.18	5.355	10.155	6.285	3.72
2016-12-26 18:05:00	410	14.905	11.73	6.265	5.355	10.155	6.285	3.72
2016-12-26 18:10:00	411	15.33	11.73	6.18	5.355	10.155	6.285	3.72
2016-12-26 18:15:00	412	15.84	11.73	6.265	5.355	10.155	6.285	3.72
2016-12-26 18:20:00	413	16.095	11.815	6.265	5.355	10.155	6.285	3.72
2016-12-26 18:25:00	414	16.265	11.815	6.265	5.355	10.155	6.285	3.72
2016-12-26 18:30:00	415	16.265	11.815	6.265	5.355	10.155	6.285	3.72
2016-12-26 18:35:00	416	16.265	11.815	6.265	5.355	10.155	6.285	3.72
2016-12-26 18:40:00	417	16.265	11.815	6.265	5.355	10.155	6.285	3.72
2016-12-26 18:45:00	418	16.18	11.815	6.265	5.355	10.155	6.285	3.72
2016-12-26 18:50:00	419	16.18	11.815	6.265	5.355	10.155	6.285	3.72
2016-12-26 18:55:00	420	16.095	11.815	6.265	5.355	10.155	6.285	3.72
2016-12-26 19:00:00	421	16.095	11.815	6.265	5.355	10.155	6.285	3.72
2016-12-26 19:05:00	422	16.01	11.73	6.265	5.355	10.155	6.285	3.72
2016-12-26 19:10:00	423	15.925	11.815	6.265	5.355	10.155	6.285	3.72
2016-12-26 19:15:00	424	15.925	11.815	6.265	5.355	10.155	6.285	3.72
2016-12-26 19:20:00	425	15.84	11.815	6.265	5.355	10.155	6.285	3.72
2016-12-26 19:25:00	426	15.755	11.73	6.265	5.355	10.24	6.285	3.72
2016-12-26 19:30:00	427	15.67	11.815	6.265	5.355	10.24	6.285	3.72
2016-12-26 19:35:00	428	15.67	11.815	6.265	5.355	10.24	6.285	3.72
2016-12-26 19:40:00	429	15.585	11.815	6.265	5.355	10.24	6.285	3.72
2016-12-26 19:45:00	430	15.5	11.73	6.265	5.355	10.24	6.285	3.72
2016-12-26 19:50:00	431	15.415	11.815	6.265	5.355	10.24	6.285	3.72
2016-12-26 19:55:00	432	15.33	11.73	6.265	5.355	10.24	6.285	3.72
2016-12-26 20:00:00	433	15.33	11.73	6.265	5.355	10.24	6.285	3.72
2016-12-26 20:05:00	434	15.245	11.73	6.265	5.355	10.24	6.285	3.72
2016-12-26 20:10:00	435	15.16	11.73	6.265	5.355	10.24	6.285	3.72
2016-12-26 20:15:00	436	15.16	11.73	6.265	5.355	10.24	6.285	3.72
2016-12-26 20:20:00	437	15.075	11.73	6.265	5.355	10.24	6.285	3.72
2016-12-26 20:25:00	438	14.99	11.73	6.265	5.355	10.24	6.285	3.72
2016-12-26 20:30:00	439	14.99	11.73	6.265	5.355	10.24	6.285	3.72
2016-12-26 20:35:00	440	15.16	11.815	6.265	5.355	10.24	6.285	3.72
2016-12-26 20:40:00	441	15.585	11.815	6.265	5.355	10.24	6.285	3.72
2016-12-26 20:45:00	442	16.01	11.815	6.265	5.355	10.24	6.285	3.72
2016-12-26 20:50:00	443	16.35	11.815	6.265	5.355	10.24	6.285	3.72
2016-12-26 20:55:00	444	16.52	11.815	6.265	5.355	10.24	6.285	3.72
2016-12-26 21:00:00	445	16.69	11.815	6.265	5.355	10.24	6.285	3.72
2016-12-26 21:05:00	446	16.69	11.815	6.265	5.355	10.24	6.285	3.72
2016-12-26 21:10:00	447	16.69	11.815	6.265	5.355	10.24	6.285	3.72
2016-12-26 21:15:00	448	16.69	11.815	6.265	5.355	10.24	6.285	3.72
2016-12-26 21:20:00	449	16.69	11.815	6.265	5.355	10.24	6.285	3.72
2016-12-26 21:25:00	450	16.69	11.815	6.265	5.355	10.24	6.285	3.72
2016-12-26 21:30:00	451	16.605	11.815	6.265	5.355	10.24	6.285	3.72
2016-12-26 21:35:00	452	16.605	11.815	6.265	5.355	10.24	6.285	3.72
2016-12-26 21:40:00	453	16.605	11.815	6.265	5.355	10.24	6.285	3.72
2016-12-26 21:45:00	454	16.52	11.815	6.265	5.355	10.24	6.285	3.72
2016-12-26 21:50:00	455	16.435	11.815	6.265	5.355	10.24	6.285	3.72
2016-12-26 21:55:00	456	16.435	11.815	6.265	5.355	10.24	6.285	3.72
2016-12-26 22:00:00	457	16.35	11.815	6.265	5.355	10.24	6.285	3.72
2016-12-26 22:05:00	458	16.35	11.815	6.265	5.355	10.24	6.285	3.72
2016-12-26 22:10:00	459	16.265	11.815	6.265	5.355	10.24	6.285	3.72
2016-12-26 22:15:00	460	16.18	11.815	6.265	5.355	10.24	6.37	3.72
2016-12-26 22:20:00	461	16.18	11.815	6.265	5.44	10.24	6.37	3.72
2016-12-26 22:25:00	462	16.095	11.815	6.265	5.355	10.24	6.37	3.72
2016-12-26 22:30:00	463	16.095	11.815	6.265	5.355	10.24	6.37	3.72
2016-12-26 22:35:00	464	16.095	11.815	6.265	5.355	10.24	6.37	3.72
2016-12-26 22:40:00	465	16.095	11.815	6.265	5.355	10.24	6.37	3.72
2016-12-26 22:45:00	466	16.01	11.815	6.265	5.355	10.24	6.37	3.72
2016-12-26 22:50:00	467	16.01	11.815	6.265	5.355	10.24	6.37	3.72
2016-12-26 22:55:00	468	16.01	11.815	6.265	5.355	10.24	6.37	3.72
2016-12-26 23:00:00	469	15.925	11.815	6.265	5.355	10.24	6.37	3.72
2016-12-26 23:05:00	470	16.01	11.815	6.265	5.27	10.24	6.37	3.72
2016-12-26 23:10:00	471	15.925	11.815	6.265	5.27	10.24	6.37	3.72
2016-12-26 23:15:00	472	15.84	11.815	6.265	5.27	10.24	6.37	3.72
2016-12-26 23:20:00	473	15.84	11.815	6.265	5.27	10.24	6.37	3.72
2016-12-26 23:25:00	474	15.84	11.815	6.265	5.27	10.24	6.37	3.72
2016-12-26 23:30:00	475	15.755	11.815	6.265	5.27	10.24	6.37	3.72
2016-12-26 23:35:00	476	15.755	11.815	6.265	5.27	10.24	6.37	3.635
2016-12-26 23:40:00	477	15.67	11.815	6.18	5.27	10.24	6.37	3.635
2016-12-26 23:45:00	478	15.67	11.815	6.18	5.27	10.24	6.37	3.635
2016-12-26 23:50:00	479	15.67	11.815	6.18	5.27	10.24	6.37	3.635
2016-12-26 23:55:00	480	15.585	11.815	6.18	5.27	10.24	6.37	3.635
2016-12-27	481	15.585	11.815	6.18	5.27	10.24	6.37	3.635
2016-12-27 00:05:00	482	15.5	11.73	6.18	5.27	10.24	6.285	3.635
2016-12-27 00:10:00	483	15.5	11.73	6.18	5.27	10.24	6.285	3.635
2016-12-27 00:15:00	484	15.5	11.73	6.18	5.27	10.24	6.285	3.635
2016-12-27 00:20:00	485	15.415	11.73	6.18	5.27	10.24	6.285	3.635
2016-12-27 00:25:00	486	15.415	11.73	6.18	5.27	10.24	6.285	3.635
2016-12-27 00:30:00	487	15.33	11.73	6.18	5.27	10.155	6.285	3.635
2016-12-27 00:35:00	488	15.33	11.73	6.18	5.27	10.155	6.285	3.635
2016-12-27 00:40:00	489	15.33	11.73	6.18	5.27	10.155	6.285	3.635
2016-12-27 00:45:00	490	15.33	11.73	6.18	5.27	10.155	6.285	3.635
2016-12-27 00:50:00	491	15.245	11.73	6.18	5.27	10.155	6.285	3.635
2016-12-27 00:55:00	492	15.245	11.73	6.095	5.27	10.155	6.285	3.635
2016-12-27 01:00:00	493	15.16	11.73	6.095	5.27	10.155	6.285	3.635
2016-12-27 01:05:00	494	15.16	11.645	6.095	5.27	10.155	6.285	3.635
2016-12-27 01:10:00	495	15.16	11.645	6.095	5.27	10.155	6.285	3.635
2016-12-27 01:15:00	496	15.075	11.645	6.095	5.27	10.155	6.285	3.635
2016-12-27 01:20:00	497	15.075	11.645	6.095	5.27	10.155	6.2	3.635
2016-12-27 01:25:00	498	15.075	11.645	6.095	5.27	10.155	6.2	3.635
2016-12-27 01:30:00	499	14.99	11.645	6.095	5.27	10.155	6.2	3.635
2016-12-27 01:35:00	500	14.99	11.645	6.095	5.27	10.155	6.2	3.635
2016-12-27 01:40:00	501	14.99	11.645	6.095	5.27	10.07	6.2	3.635
2016-12-27 01:45:00	502	14.905	11.645	6.095	5.27	10.07	6.2	3.635
2016-12-27 01:50:00	503	14.905	11.645	6.095	5.27	10.07	6.2	3.55
2016-12-27 01:55:00	504	14.905	11.645	6.095	5.27	10.07	6.2	3.55
2016-12-27 02:00:00	505	14.905	11.56	6.095	5.27	10.07	6.2	3.55
2016-12-27 02:05:00	506	14.82	11.56	6.095	5.27	10.07	6.2	3.55
2016-12-27 02:10:00	507	14.82	11.56	6.095	5.27	10.07	6.2	3.55
2016-12-27 02:15:00	508	14.82	11.56	6.095	5.27	10.07	6.2	3.55
2016-12-27 02:20:00	509	14.82	11.56	6.01	5.27	10.07	6.2	3.55
2016-12-27 02:25:00	510	14.735	11.56	6.01	5.27	10.07	6.2	3.55
2016-12-27 02:30:00	511	14.735	11.56	6.01	5.27	10.07	6.115	3.55
2016-12-27 02:35:00	512	14.735	11.56	6.01	5.27	10.07	6.115	3.55
2016-12-27 02:40:00	513	14.735	11.56	6.01	5.27	10.07	6.115	3.55
2016-12-27 02:45:00	514	14.65	11.56	6.01	5.27	10.07	6.115	3.55
2016-12-27 02:50:00	515	14.65	11.56	6.01	5.27	10.07	6.115	3.55
2016-12-27 02:55:00	516	14.65	11.56	6.01	5.27	10.07	6.115	3.55
2016-12-27 03:00:00	517	14.65	11.56	6.01	5.185	9.985	6.115	3.55
2016-12-27 03:05:00	518	14.65	11.475	6.01	5.27	9.985	6.115	3.55
2016-12-27 03:10:00	519	14.565	11.475	6.01	5.185	9.985	6.115	3.55
2016-12-27 03:15:00	520	14.565	11.475	6.01	5.185	9.985	6.115	3.55
2016-12-27 03:20:00	521	14.565	11.475	6.01	5.185	9.985	6.115	3.55
2016-12-27 03:25:00	522	14.565	11.475	6.01	5.185	9.985	6.115	3.55
2016-12-27 03:30:00	523	14.48	11.475	6.01	5.185	9.985	6.115	3.55
2016-12-27 03:35:00	524	14.48	11.475	6.01	5.185	9.985	6.115	3.55
2016-12-27 03:40:00	525	14.48	11.475	6.01	5.185	9.985	6.115	3.55
2016-12-27 03:45:00	526	14.48	11.475	6.01	5.185	9.985	6.115	3.55
2016-12-27 03:50:00	527	14.48	11.475	6.01	5.185	9.985	6.115	3.55
2016-12-27 03:55:00	528	14.395	11.475	6.01	5.185	9.985	6.115	3.55
2016-12-27 04:00:00	529	14.395	11.475	6.01	5.185	9.985	6.115	3.55
2016-12-27 04:05:00	530	14.395	11.475	6.01	5.185	9.985	6.03	3.55
2016-12-27 04:10:00	531	14.395	11.475	6.01	5.185	9.985	6.03	3.55
2016-12-27 04:15:00	532	14.395	11.475	6.01	5.185	9.985	6.03	3.55
2016-12-27 04:20:00	533	14.31	11.475	6.01	5.185	9.985	6.03	3.55
2016-12-27 04:25:00	534	14.31	11.475	6.01	5.185	9.985	6.03	3.55
2016-12-27 04:30:00	535	14.31	11.39	6.01	5.185	9.9	6.03	3.55
2016-12-27 04:35:00	536	14.31	11.39	6.01	5.185	9.9	6.03	3.55
2016-12-27 04:40:00	537	14.31	11.39	5.925	5.185	9.9	6.03	3.55
2016-12-27 04:45:00	538	14.31	11.39	5.925	5.185	9.9	6.03	3.55
2016-12-27 04:50:00	539	14.225	11.39	5.925	5.185	9.9	6.03	3.55
2016-12-27 04:55:00	540	14.225	11.39	5.925	5.185	9.9	6.03	3.55
2016-12-27 05:00:00	541	14.225	11.39	5.925	5.185	9.9	6.03	3.55
2016-12-27 05:05:00	542	14.225	11.39	5.925	5.185	9.9	6.03	3.55
2016-12-27 05:10:00	543	14.14	11.39	5.925	5.185	9.9	6.03	3.55
2016-12-27 05:15:00	544	14.14	11.39	5.925	5.185	9.9	6.03	3.55
2016-12-27 05:20:00	545	14.14	11.39	5.925	5.185	9.9	6.03	3.55
2016-12-27 05:25:00	546	14.14	11.39	5.925	5.185	9.9	6.03	3.55
2016-12-27 05:30:00	547	14.14	11.39	5.925	5.185	9.9	6.03	3.55
2016-12-27 05:35:00	548	14.14	11.39	5.925	5.185	9.9	6.03	3.55
2016-12-27 05:40:00	549	14.055	11.39	5.925	5.185	9.9	6.03	3.55
2016-12-27 05:45:00	550	14.055	11.39	5.925	5.185	9.9	6.03	3.55
2016-12-27 05:50:00	551	14.055	11.39	5.925	5.185	9.9	6.03	3.55
2016-12-27 05:55:00	552	14.055	11.39	5.925	5.185	9.9	6.03	3.55
2016-12-27 06:00:00	553	14.055	11.305	5.925	5.185	9.9	6.03	3.55
2016-12-27 06:05:00	554	14.055	11.39	5.925	5.185	9.9	6.03	3.55
2016-12-27 06:10:00	555	13.97	11.305	5.925	5.185	9.9	6.03	3.55
2016-12-27 06:15:00	556	13.97	11.305	5.925	5.185	9.9	6.03	3.55
2016-12-27 06:20:00	557	13.97	11.305	5.925	5.185	9.9	6.03	3.465
2016-12-27 06:25:00	558	13.97	11.305	5.925	5.185	9.9	5.945	3.55
2016-12-27 06:30:00	559	13.97	11.305	5.925	5.185	9.9	5.945	3.465
2016-12-27 06:35:00	560	13.97	11.305	5.925	5.185	9.9	5.945	3.465
2016-12-27 06:40:00	561	13.97	11.305	5.925	5.185	9.815	5.945	3.465
2016-12-27 06:45:00	562	13.885	11.305	5.925	5.185	9.815	5.945	3.465
2016-12-27 06:50:00	563	13.885	11.305	5.925	5.185	9.815	5.945	3.465
2016-12-27 06:55:00	564	13.885	11.305	5.925	5.185	9.815	5.945	3.465
2016-12-27 07:00:00	565	13.885	11.305	5.925	5.185	9.815	5.945	3.465
2016-12-27 07:05:00	566	13.885	11.305	5.925	5.185	9.815	5.945	3.465
2016-12-27 07:10:00	567	13.8	11.305	5.925	5.185	9.815	5.945	3.465
2016-12-27 07:15:00	568	13.8	11.305	5.925	5.185	9.815	5.945	3.465
2016-12-27 07:20:00	569	13.8	11.305	5.925	5.185	9.815	5.945	3.465
2016-12-27 07:25:00	570	13.8	11.305	5.925	5.185	9.815	5.945	3.465
2016-12-27 07:30:00	571	13.8	11.305	5.925	5.185	9.815	5.945	3.465
2016-12-27 07:35:00	572	13.8	11.305	5.925	5.185	9.815	5.945	3.465
2016-12-27 07:40:00	573	13.8	11.305	5.925	5.185	9.815	5.945	3.465
2016-12-27 07:45:00	574	13.715	11.22	5.925	5.185	9.815	5.945	3.465
2016-12-27 07:50:00	575	13.8	11.22	5.925	5.185	9.815	5.945	3.465
2016-12-27 07:55:00	576	13.715	11.22	5.925	5.185	9.815	5.945	3.465
2016-12-27 08:00:00	577	13.715	11.22	5.925	5.185	9.815	5.945	3.465
2016-12-27 08:05:00	578	14.055	11.22	5.925	5.185	9.815	5.945	3.465
2016-12-27 08:10:00	579	14.735	11.305	5.84	5.185	9.815	5.945	3.465
2016-12-27 08:15:00	580	15.16	11.305	5.84	5.185	9.815	5.945	3.465
2016-12-27 08:20:00	581	15.245	11.305	5.84	5.185	9.815	5.945	3.465
2016-12-27 08:25:00	582	15.33	11.305	5.84	5.27	9.815	5.945	3.465
2016-12-27 08:30:00	583	15.33	11.305	5.84	5.27	9.815	5.945	3.465
2016-12-27 08:35:00	584	15.245	11.305	5.84	5.27	9.815	5.945	3.55
2016-12-27 08:40:00	585	15.245	11.305	5.84	5.27	9.815	5.945	3.465
2016-12-27 08:45:00	586	15.245	11.22	5.84	5.27	9.815	5.945	3.465
2016-12-27 08:50:00	587	15.245	11.305	5.84	5.27	9.815	5.945	3.55
2016-12-27 08:55:00	588	15.16	11.22	5.84	5.27	9.815	5.945	3.55
2016-12-27 09:00:00	589	15.075	11.22	5.84	5.27	9.815	5.945	3.55
2016-12-27 09:05:00	590	14.99	11.22	5.84	5.27	9.815	5.945	3.55
2016-12-27 09:10:00	591	14.99	11.22	5.84	5.27	9.815	5.945	3.55
2016-12-27 09:15:00	592	14.99	11.22	5.84	5.27	9.815	5.945	3.55
2016-12-27 09:20:00	593	14.905	11.22	5.925	5.27	9.815	5.945	3.55
2016-12-27 09:25:00	594	14.82	11.22	5.925	5.27	9.815	5.945	3.55
2016-12-27 09:30:00	595	14.735	11.22	5.925	5.355	9.815	5.945	3.55
2016-12-27 09:35:00	596	14.735	11.22	5.925	5.355	9.815	5.945	3.55
2016-12-27 09:40:00	597	14.65	11.305	5.925	5.355	9.815	5.945	3.55
2016-12-27 09:45:00	598	14.65	11.305	5.925	5.355	9.815	5.945	3.55
2016-12-27 09:50:00	599	14.565	11.305	5.925	5.355	9.815	5.945	3.55
2016-12-27 09:55:00	600	14.565	11.305	5.925	5.355	9.815	5.945	3.55
2016-12-27 10:00:00	601	14.565	11.305	5.925	5.355	9.815	5.945	3.55
2016-12-27 10:05:00	602	14.48	11.305	5.925	5.355	9.815	5.945	3.55
2016-12-27 10:10:00	603	14.395	11.305	5.925	5.355	9.815	5.945	3.55
2016-12-27 10:15:00	604	14.395	11.305	5.925	5.355	9.815	5.945	3.55
2016-12-27 10:20:00	605	14.31	11.305	5.925	5.355	9.815	5.945	3.55
2016-12-27 10:25:00	606	14.31	11.305	5.925	5.355	9.815	5.945	3.55
2016-12-27 10:30:00	607	14.31	11.305	6.01	5.355	9.815	5.945	3.55
2016-12-27 10:35:00	608	14.48	11.305	6.01	5.355	9.815	5.945	3.55
2016-12-27 10:40:00	609	15.075	11.305	6.01	5.355	9.815	5.945	3.55
2016-12-27 10:45:00	610	15.585	11.39	6.01	5.355	9.815	5.945	3.55
2016-12-27 10:50:00	611	15.84	11.39	6.01	5.355	9.815	5.945	3.55
2016-12-27 10:55:00	612	15.925	11.39	6.01	5.355	9.9	5.945	3.55
2016-12-27 11:00:00	613	16.01	11.39	6.01	5.355	9.9	5.945	3.635
2016-12-27 11:05:00	614	16.01	11.39	6.01	5.355	9.9	5.945	3.635
2016-12-27 11:10:00	615	16.01	11.39	6.01	5.355	9.815	5.945	3.55
2016-12-27 11:15:00	616	15.925	11.39	6.01	5.355	9.815	5.945	3.635
2016-12-27 11:20:00	617	15.925	11.39	6.01	5.355	9.9	6.03	3.635
2016-12-27 11:25:00	618	15.925	11.39	6.01	5.355	9.9	6.03	3.635
2016-12-27 11:30:00	619	15.84	11.39	6.01	5.355	9.9	6.03	3.635
2016-12-27 11:35:00	620	15.84	11.39	6.01	5.355	9.9	6.03	3.635
2016-12-27 11:40:00	621	15.67	11.475	6.01	5.355	9.9	6.03	3.635
2016-12-27 11:45:00	622	15.67	11.39	6.01	5.355	9.9	6.03	3.635
2016-12-27 11:50:00	623	15.585	11.39	6.01	5.355	9.9	6.03	3.635
2016-12-27 11:55:00	624	15.5	11.475	6.01	5.355	9.9	6.03	3.635
2016-12-27 12:00:00	625	15.415	11.475	6.01	5.355	9.9	6.03	3.635
2016-12-27 12:05:00	626	15.415	11.475	6.01	5.355	9.9	6.03	3.635
2016-12-27 12:10:00	627	15.33	11.475	6.095	5.355	9.9	6.03	3.635
2016-12-27 12:15:00	628	15.245	11.475	6.095	5.355	9.9	6.03	3.635
2016-12-27 12:20:00	629	15.16	11.475	6.095	5.355	9.9	6.03	3.635
2016-12-27 12:25:00	630	15.075	11.475	6.095	5.355	9.9	6.03	3.635
2016-12-27 12:30:00	631	14.99	11.475	6.095	5.355	9.9	6.03	3.635
2016-12-27 12:35:00	632	14.905	11.475	6.095	5.355	9.985	6.03	3.635
2016-12-27 12:40:00	633	14.905	11.475	6.095	5.355	9.985	6.03	3.635
2016-12-27 12:45:00	634	14.82	11.475	6.095	5.355	9.985	6.03	3.635
2016-12-27 12:50:00	635	14.735	11.475	6.095	5.355	9.985	6.115	3.635
2016-12-27 12:55:00	636	14.65	11.475	6.095	5.355	9.985	6.115	3.635
2016-12-27 13:00:00	637	14.65	11.475	6.095	5.355	9.985	6.115	3.635
2016-12-27 13:05:00	638	14.82	11.475	6.095	5.355	9.985	6.115	3.635
2016-12-27 13:10:00	639	15.245	11.475	6.095	5.355	9.985	6.115	3.635
2016-12-27 13:15:00	640	15.67	11.56	6.095	5.355	9.985	6.115	3.635
2016-12-27 13:20:00	641	16.01	11.56	6.095	5.355	9.985	6.115	3.635
2016-12-27 13:25:00	642	16.18	11.56	6.095	5.355	9.985	6.115	3.635
2016-12-27 13:30:00	643	16.265	11.56	6.095	5.355	9.985	6.115	3.635
2016-12-27 13:35:00	644	16.265	11.56	6.095	5.355	9.985	6.115	3.635
2016-12-27 13:40:00	645	16.265	11.56	6.095	5.355	9.985	6.115	3.635
2016-12-27 13:45:00	646	16.265	11.56	6.095	5.355	10.07	6.115	3.635
2016-12-27 13:50:00	647	16.18	11.56	6.095	5.355	10.07	6.115	3.635
2016-12-27 13:55:00	648	16.18	11.56	6.095	5.355	10.07	6.115	3.635
2016-12-27 14:00:00	649	16.095	11.56	6.18	5.355	10.07	6.115	3.635
2016-12-27 14:05:00	650	16.01	11.56	6.095	5.355	10.07	6.115	3.72
2016-12-27 14:10:00	651	15.925	11.56	6.095	5.355	10.07	6.115	3.635
2016-12-27 14:15:00	652	15.84	11.56	6.095	5.355	10.07	6.115	3.635
2016-12-27 14:20:00	653	15.755	11.56	6.095	5.355	10.07	6.115	3.635
2016-12-27 14:25:00	654	15.67	11.56	6.095	5.355	10.07	6.115	3.635
2016-12-27 14:30:00	655	15.585	11.56	6.18	5.355	10.07	6.115	3.635
2016-12-27 14:35:00	656	15.5	11.56	6.18	5.355	10.07	6.2	3.635
2016-12-27 14:40:00	657	15.415	11.56	6.18	5.355	10.07	6.115	3.635
2016-12-27 14:45:00	658	15.33	11.56	6.18	5.355	10.07	6.2	3.635
2016-12-27 14:50:00	659	15.245	11.56	6.18	5.355	10.07	6.2	3.635
2016-12-27 14:55:00	660	15.16	11.56	6.18	5.355	10.07	6.2	3.635
2016-12-27 15:00:00	661	15.075	11.645	6.18	5.355	10.07	6.2	3.635
2016-12-27 15:05:00	662	15.075	11.645	6.18	5.355	10.07	6.2	3.635
2016-12-27 15:10:00	663	14.99	11.645	6.18	5.355	10.07	6.2	3.635
2016-12-27 15:15:00	664	14.905	11.645	6.18	5.355	10.07	6.2	3.635
2016-12-27 15:20:00	665	14.82	11.645	6.18	5.355	10.07	6.2	3.635
2016-12-27 15:25:00	666	14.82	11.645	6.18	5.355	10.07	6.2	3.72
2016-12-27 15:30:00	667	14.735	11.645	6.18	5.355	10.07	6.2	3.635
2016-12-27 15:35:00	668	14.82	11.645	6.18	5.355	10.07	6.2	3.72
2016-12-27 15:40:00	669	15.075	11.645	6.18	5.355	10.07	6.2	3.72
2016-12-27 15:45:00	670	15.415	11.645	6.18	5.355	10.07	6.2	3.72
2016-12-27 15:50:00	671	15.755	11.645	6.18	5.355	10.07	6.2	3.72
2016-12-27 15:55:00	672	15.925	11.645	6.18	5.355	10.07	6.2	3.72
2016-12-27 16:00:00	673	16.18	11.645	6.18	5.355	10.07	6.2	3.72
2016-12-27 16:05:00	674	16.35	11.645	6.18	5.355	10.07	6.2	3.72
2016-12-27 16:10:00	675	16.435	11.645	6.18	5.355	10.07	6.2	3.72
2016-12-27 16:15:00	676	16.435	11.645	6.18	5.355	10.07	6.2	3.72
2016-12-27 16:20:00	677	16.35	11.645	6.18	5.355	10.07	6.2	3.72
2016-12-27 16:25:00	678	16.35	11.645	6.18	5.44	10.07	6.2	3.72
2016-12-27 16:30:00	679	16.265	11.73	6.18	5.355	10.07	6.2	3.72
2016-12-27 16:35:00	680	16.18	11.645	6.18	5.355	10.07	6.2	3.72
2016-12-27 16:40:00	681	16.095	11.645	6.18	5.44	10.155	6.2	3.72
2016-12-27 16:45:00	682	16.01	11.645	6.18	5.355	10.155	6.2	3.72
2016-12-27 16:50:00	683	15.925	11.73	6.18	5.44	10.155	6.2	3.72
2016-12-27 16:55:00	684	15.84	11.645	6.18	5.355	10.155	6.2	3.72
2016-12-27 17:00:00	685	15.755	11.645	6.18	5.44	10.155	6.2	3.72
2016-12-27 17:05:00	686	15.67	11.645	6.18	5.355	10.155	6.285	3.72
2016-12-27 17:10:00	687	15.585	11.645	6.18	5.355	10.155	6.285	3.72
2016-12-27 17:15:00	688	15.5	11.645	6.18	5.355	10.155	6.285	3.72
2016-12-27 17:20:00	689	15.415	11.645	6.18	5.355	10.155	6.285	3.72
2016-12-27 17:25:00	690	15.33	11.645	6.18	5.355	10.155	6.285	3.72
2016-12-27 17:30:00	691	15.245	11.645	6.18	5.355	10.155	6.285	3.72
2016-12-27 17:35:00	692	15.16	11.645	6.18	5.355	10.155	6.285	3.72
2016-12-27 17:40:00	693	15.075	11.645	6.18	5.355	10.155	6.285	3.72
2016-12-27 17:45:00	694	14.99	11.645	6.18	5.355	10.155	6.285	3.72
2016-12-27 17:50:00	695	14.99	11.645	6.18	5.355	10.155	6.285	3.72
2016-12-27 17:55:00	696	14.905	11.645	6.18	5.355	10.155	6.285	3.72
2016-12-27 18:00:00	697	14.82	11.645	6.18	5.355	10.155	6.285	3.72
2016-12-27 18:05:00	698	14.905	11.645	6.18	5.355	10.155	6.285	3.72
2016-12-27 18:10:00	699	15.16	11.73	6.18	5.355	10.155	6.285	3.72
2016-12-27 18:15:00	700	15.585	11.73	6.18	5.44	10.155	6.285	3.72
2016-12-27 18:20:00	701	15.84	11.73	6.18	5.44	10.155	6.285	3.72
2016-12-27 18:25:00	702	16.095	11.73	6.18	5.44	10.155	6.285	3.72
2016-12-27 18:30:00	703	16.35	11.73	6.18	5.44	10.155	6.285	3.72
2016-12-27 18:35:00	704	16.52	11.73	6.18	5.44	10.155	6.285	3.72
2016-12-27 18:40:00	705	16.52	11.73	6.18	5.44	10.155	6.285	3.72
2016-12-27 18:45:00	706	16.52	11.73	6.18	5.44	10.155	6.285	3.72
2016-12-27 18:50:00	707	16.52	11.73	6.18	5.44	10.155	6.285	3.72
2016-12-27 18:55:00	708	16.52	11.73	6.18	5.44	10.155	6.285	3.72
2016-12-27 19:00:00	709	16.435	11.73	6.18	5.44	10.155	6.285	3.72
2016-12-27 19:05:00	710	16.435	11.73	6.18	5.44	10.155	6.285	3.72
2016-12-27 19:10:00	711	16.35	11.73	6.18	5.44	10.155	6.285	3.72
2016-12-27 19:15:00	712	16.265	11.73	6.18	5.44	10.155	6.285	3.72
2016-12-27 19:20:00	713	16.18	11.73	6.18	5.44	10.155	6.285	3.72
2016-12-27 19:25:00	714	16.095	11.73	6.18	5.44	10.155	6.285	3.72
2016-12-27 19:30:00	715	16.01	11.73	6.18	5.44	10.155	6.285	3.72
2016-12-27 19:35:00	716	16.01	11.73	6.18	5.44	10.155	6.285	3.72
2016-12-27 19:40:00	717	15.925	11.73	6.18	5.44	10.155	6.285	3.72
2016-12-27 19:45:00	718	15.755	11.73	6.18	5.44	10.155	6.285	3.72
2016-12-27 19:50:00	719	15.755	11.73	6.18	5.44	10.155	6.285	3.72
2016-12-27 19:55:00	720	15.67	11.73	6.18	5.44	10.155	6.285	3.72
2016-12-27 20:00:00	721	15.585	11.73	6.18	5.44	10.155	6.285	3.72
2016-12-27 20:05:00	722	15.5	11.73	6.18	5.44	10.155	6.285	3.72
2016-12-27 20:10:00	723	15.415	11.73	6.18	5.44	10.155	6.285	3.72
2016-12-27 20:15:00	724	15.33	11.73	6.18	5.44	10.155	6.285	3.72
2016-12-27 20:20:00	725	15.245	11.73	6.18	5.44	10.155	6.285	3.72
2016-12-27 20:25:00	726	15.16	11.73	6.18	5.44	10.155	6.285	3.72
2016-12-27 20:30:00	727	15.16	11.73	6.18	5.44	10.155	6.285	3.72
2016-12-27 20:35:00	728	15.16	11.73	6.18	5.44	10.155	6.285	3.72
2016-12-27 20:40:00	729	15.245	11.73	6.18	5.44	10.155	6.285	3.72
2016-12-27 20:45:00	730	15.5	11.73	6.18	5.44	10.155	6.285	3.72
2016-12-27 20:50:00	731	15.755	11.73	6.18	5.44	10.155	6.285	3.72
2016-12-27 20:55:00	732	15.925	11.73	6.18	5.44	10.155	6.285	3.72
2016-12-27 21:00:00	733	16.095	11.73	6.18	5.44	10.155	6.285	3.72
2016-12-27 21:05:00	734	16.35	11.73	6.18	5.44	10.155	6.285	3.72
2016-12-27 21:10:00	735	16.435	11.73	6.18	5.44	10.155	6.285	3.72
2016-12-27 21:15:00	736	16.605	11.73	6.18	5.44	10.155	6.285	3.72
2016-12-27 21:20:00	737	16.775	11.73	6.18	5.44	10.155	6.285	3.72
2016-12-27 21:25:00	738	16.86	11.73	6.18	5.44	10.155	6.285	3.805
2016-12-27 21:30:00	739	16.945	11.815	6.18	5.44	10.155	6.285	3.72
2016-12-27 21:35:00	740	16.945	11.73	6.18	5.44	10.155	6.285	3.72
2016-12-27 21:40:00	741	16.86	11.73	6.18	5.44	10.155	6.285	3.72
2016-12-27 21:45:00	742	16.86	11.73	6.18	5.44	10.155	6.285	3.72
2016-12-27 21:50:00	743	16.775	11.73	6.18	5.44	10.155	6.285	3.72
2016-12-27 21:55:00	744	16.775	11.73	6.265	5.44	10.155	6.285	3.72
2016-12-27 22:00:00	745	16.69	11.73	6.18	5.44	10.155	6.285	3.72
2016-12-27 22:05:00	746	16.605	11.73	6.18	5.44	10.155	6.285	3.805
2016-12-27 22:10:00	747	16.52	11.73	6.18	5.44	10.155	6.37	3.805
2016-12-27 22:15:00	748	16.52	11.73	6.18	5.44	10.24	6.37	3.805
2016-12-27 22:20:00	749	16.435	11.815	6.18	5.44	10.24	6.37	3.805
2016-12-27 22:25:00	750	16.435	11.815	6.18	5.44	10.24	6.37	3.805
2016-12-27 22:30:00	751	16.435	11.815	6.18	5.44	10.24	6.37	3.805
2016-12-27 22:35:00	752	16.35	11.815	6.18	5.44	10.24	6.37	3.805
2016-12-27 22:40:00	753	16.35	11.815	6.18	5.44	10.24	6.37	3.805
2016-12-27 22:45:00	754	16.35	11.815	6.18	5.355	10.24	6.37	3.72
2016-12-27 22:50:00	755	16.265	11.815	6.265	5.355	10.24	6.37	3.72
2016-12-27 22:55:00	756	16.265	11.815	6.265	5.355	10.24	6.37	3.72
2016-12-27 23:00:00	757	16.18	11.73	6.265	5.355	10.24	6.37	3.72
2016-12-27 23:05:00	758	16.18	11.73	6.265	5.355	10.24	6.37	3.72
2016-12-27 23:10:00	759	16.18	11.73	6.18	5.355	10.24	6.37	3.72
2016-12-27 23:15:00	760	16.095	11.815	6.18	5.355	10.24	6.37	3.72
2016-12-27 23:20:00	761	16.095	11.73	6.18	5.355	10.24	6.37	3.72
2016-12-27 23:25:00	762	16.01	11.73	6.18	5.355	10.24	6.37	3.72
2016-12-27 23:30:00	763	16.01	11.73	6.18	5.355	10.24	6.37	3.72
2016-12-27 23:35:00	764	16.01	11.73	6.18	5.355	10.24	6.37	3.72
2016-12-27 23:40:00	765	15.925	11.73	6.18	5.27	10.24	6.37	3.72
2016-12-27 23:45:00	766	15.925	11.73	6.18	5.27	10.24	6.37	3.72
2016-12-27 23:50:00	767	15.84	11.73	6.18	5.27	10.24	6.37	3.72
2016-12-27 23:55:00	768	15.84	11.73	6.18	5.27	10.24	6.37	3.72
2016-12-28	769	15.755	11.73	6.18	5.27	10.155	6.37	3.72
2016-12-28 00:05:00	770	15.755	11.73	6.18	5.27	10.155	6.285	3.635
2016-12-28 00:10:00	771	15.755	11.73	6.18	5.27	10.155	6.37	3.635
2016-12-28 00:15:00	772	15.67	11.73	6.18	5.27	10.155	6.285	3.635
2016-12-28 00:20:00	773	15.67	11.645	6.18	5.27	10.155	6.285	3.635
2016-12-28 00:25:00	774	15.585	11.645	6.095	5.27	10.155	6.285	3.635
2016-12-28 00:30:00	775	15.585	11.645	6.095	5.27	10.155	6.285	3.635
2016-12-28 00:35:00	776	15.5	11.645	6.095	5.27	10.155	6.285	3.635
2016-12-28 00:40:00	777	15.5	11.645	6.18	5.27	10.155	6.285	3.635
2016-12-28 00:45:00	778	15.415	11.645	6.095	5.27	10.155	6.285	3.635
2016-12-28 00:50:00	779	15.415	11.645	6.095	5.27	10.155	6.285	3.635
2016-12-28 00:55:00	780	15.415	11.645	6.095	5.27	10.155	6.285	3.635
2016-12-28 01:00:00	781	15.33	11.645	6.095	5.27	10.155	6.285	3.635
2016-12-28 01:05:00	782	15.33	11.645	6.095	5.27	10.155	6.285	3.635
2016-12-28 01:10:00	783	15.33	11.645	6.095	5.27	10.155	6.285	3.635
2016-12-28 01:15:00	784	15.245	11.645	6.095	5.27	10.155	6.285	3.635
2016-12-28 01:20:00	785	15.245	11.645	6.095	5.27	10.07	6.285	3.635
2016-12-28 01:25:00	786	15.16	11.56	6.095	5.27	10.07	6.285	3.635
2016-12-28 01:30:00	787	15.16	11.56	6.095	5.27	10.07	6.2	3.635
2016-12-28 01:35:00	788	15.16	11.56	6.095	5.27	10.07	6.2	3.635
2016-12-28 01:40:00	789	15.075	11.56	6.095	5.27	10.07	6.2	3.635
2016-12-28 01:45:00	790	15.075	11.56	6.01	5.27	10.07	6.2	3.635
2016-12-28 01:50:00	791	15.075	11.56	6.01	5.27	10.07	6.2	3.635
2016-12-28 01:55:00	792	14.99	11.56	6.01	5.27	10.07	6.2	3.635
2016-12-28 02:00:00	793	14.99	11.56	6.01	5.27	10.07	6.2	3.635
2016-12-28 02:05:00	794	14.99	11.56	6.01	5.27	10.07	6.2	3.635
2016-12-28 02:10:00	795	14.905	11.56	6.01	5.27	10.07	6.2	3.635
2016-12-28 02:15:00	796	14.905	11.56	6.01	5.27	10.07	6.2	3.635
2016-12-28 02:20:00	797	14.905	11.56	6.01	5.27	10.07	6.2	3.635
2016-12-28 02:25:00	798	14.905	11.475	6.01	5.27	10.07	6.2	3.635
2016-12-28 02:30:00	799	14.82	11.475	6.01	5.27	10.07	6.2	3.55
2016-12-28 02:35:00	800	14.82	11.475	6.01	5.27	9.985	6.2	3.55
2016-12-28 02:40:00	801	14.82	11.475	6.01	5.27	9.985	6.2	3.55
2016-12-28 02:45:00	802	14.735	11.475	6.01	5.27	9.985	6.115	3.55
2016-12-28 02:50:00	803	14.735	11.475	6.01	5.27	9.985	6.115	3.55
2016-12-28 02:55:00	804	14.735	11.475	6.01	5.27	9.985	6.115	3.55
2016-12-28 03:00:00	805	14.65	11.475	6.01	5.27	9.985	6.115	3.55
2016-12-28 03:05:00	806	14.735	11.475	6.01	5.27	9.985	6.115	3.55
2016-12-28 03:10:00	807	14.65	11.475	6.01	5.27	9.985	6.115	3.55
2016-12-28 03:15:00	808	14.65	11.475	6.01	5.27	9.985	6.115	3.55
2016-12-28 03:20:00	809	14.65	11.475	6.01	5.27	9.985	6.115	3.55
2016-12-28 03:25:00	810	14.65	11.475	6.01	5.27	9.985	6.115	3.55
2016-12-28 03:30:00	811	14.65	11.475	6.01	5.27	9.985	6.115	3.55
2016-12-28 03:35:00	812	14.565	11.475	6.01	5.27	9.985	6.115	3.55
2016-12-28 03:40:00	813	14.565	11.39	6.01	5.27	9.985	6.115	3.55
2016-12-28 03:45:00	814	14.565	11.39	5.925	5.27	9.985	6.115	3.55
2016-12-28 03:50:00	815	14.48	11.39	5.925	5.27	9.985	6.115	3.55
2016-12-28 03:55:00	816	14.48	11.39	6.01	5.27	9.9	6.115	3.55
2016-12-28 04:00:00	817	14.48	11.39	5.925	5.27	9.9	6.115	3.55
2016-12-28 04:05:00	818	14.48	11.39	5.925	5.27	9.9	6.115	3.55
2016-12-28 04:10:00	819	14.395	11.39	5.925	5.27	9.9	6.115	3.55
2016-12-28 04:15:00	820	14.395	11.39	5.925	5.27	9.9	6.115	3.55
2016-12-28 04:20:00	821	14.395	11.39	6.01	5.27	9.9	6.03	3.55
2016-12-28 04:25:00	822	14.395	11.39	5.925	5.27	9.9	6.03	3.55
2016-12-28 04:30:00	823	14.395	11.39	5.925	5.27	9.9	6.03	3.55
2016-12-28 04:35:00	824	14.31	11.39	5.925	5.27	9.9	6.03	3.55
2016-12-28 04:40:00	825	14.31	11.39	5.925	5.27	9.9	6.03	3.55
2016-12-28 04:45:00	826	14.31	11.39	5.925	5.27	9.9	6.03	3.55
2016-12-28 04:50:00	827	14.31	11.39	5.925	5.27	9.9	6.03	3.55
2016-12-28 04:55:00	828	14.31	11.39	5.925	5.27	9.9	6.03	3.55
2016-12-28 05:00:00	829	14.31	11.39	5.925	5.27	9.9	6.03	3.55
2016-12-28 05:05:00	830	14.225	11.305	5.925	5.27	9.9	6.03	3.55
2016-12-28 05:10:00	831	14.225	11.305	5.925	5.27	9.9	6.03	3.55
2016-12-28 05:15:00	832	14.225	11.305	5.925	5.27	9.9	6.03	3.55
2016-12-28 05:20:00	833	14.225	11.305	5.925	5.27	9.9	6.03	3.55
2016-12-28 05:25:00	834	14.225	11.305	5.925	5.27	9.9	6.03	3.55
2016-12-28 05:30:00	835	14.225	11.305	5.925	5.27	9.9	6.03	3.55
2016-12-28 05:35:00	836	14.225	11.305	5.925	5.27	9.9	6.03	3.55
2016-12-28 05:40:00	837	14.14	11.305	5.925	5.27	9.9	6.03	3.55
2016-12-28 05:45:00	838	14.14	11.305	5.925	5.27	9.9	6.03	3.55
2016-12-28 05:50:00	839	14.14	11.305	5.925	5.27	9.9	6.03	3.55
2016-12-28 05:55:00	840	14.14	11.305	5.925	5.27	9.9	6.03	3.55
2016-12-28 06:00:00	841	14.14	11.305	5.925	5.27	9.9	6.03	3.55
2016-12-28 06:05:00	842	14.055	11.305	5.925	5.27	9.9	6.03	3.55
2016-12-28 06:10:00	843	14.055	11.305	5.925	5.27	9.9	6.03	3.55
2016-12-28 06:15:00	844	14.055	11.305	5.925	5.27	9.9	6.03	3.55
2016-12-28 06:20:00	845	14.055	11.305	5.925	5.27	9.9	6.03	3.55
2016-12-28 06:25:00	846	14.055	11.305	5.925	5.27	9.815	6.03	3.55
2016-12-28 06:30:00	847	13.97	11.305	5.925	5.27	9.815	6.03	3.55
2016-12-28 06:35:00	848	13.97	11.305	5.925	5.27	9.815	6.03	3.55
2016-12-28 06:40:00	849	13.97	11.305	5.925	5.27	9.815	6.03	3.55
2016-12-28 06:45:00	850	13.97	11.22	5.925	5.27	9.815	5.945	3.55
2016-12-28 06:50:00	851	13.97	11.22	5.925	5.185	9.815	5.945	3.55
2016-12-28 06:55:00	852	13.97	11.22	5.925	5.27	9.815	5.945	3.55
2016-12-28 07:00:00	853	13.97	11.22	5.925	5.27	9.815	5.945	3.55
2016-12-28 07:05:00	854	13.97	11.22	5.925	5.185	9.815	5.945	3.55
2016-12-28 07:10:00	855	13.885	11.22	5.925	5.185	9.815	5.945	3.55
2016-12-28 07:15:00	856	13.885	11.22	5.925	5.185	9.815	5.945	3.55
2016-12-28 07:20:00	857	13.885	11.22	5.925	5.185	9.815	5.945	3.55
2016-12-28 07:25:00	858	13.885	11.22	5.925	5.185	9.815	5.945	3.55
2016-12-28 07:30:00	859	13.885	11.22	5.84	5.185	9.815	5.945	3.55
2016-12-28 07:35:00	860	13.8	11.22	5.84	5.185	9.815	5.945	3.55
2016-12-28 07:40:00	861	13.8	11.22	5.925	5.185	9.815	5.945	3.55
2016-12-28 07:45:00	862	13.8	11.22	5.84	5.185	9.815	5.945	3.55
2016-12-28 07:50:00	863	13.8	11.22	5.84	5.185	9.815	5.945	3.465
2016-12-28 07:55:00	864	13.8	11.22	5.84	5.185	9.815	5.945	3.55
2016-12-28 08:00:00	865	13.8	11.22	5.84	5.185	9.815	5.945	3.55
2016-12-28 08:05:00	866	14.055	11.22	5.84	5.185	9.815	5.945	3.55
2016-12-28 08:10:00	867	14.565	11.22	5.84	5.185	9.815	5.945	3.465
2016-12-28 08:15:00	868	15.075	11.22	5.84	5.185	9.815	5.945	3.465
2016-12-28 08:20:00	869	15.33	11.22	5.84	5.27	9.815	5.945	3.465
2016-12-28 08:25:00	870	15.415	11.22	5.84	5.27	9.815	5.945	3.55
2016-12-28 08:30:00	871	15.415	11.22	5.84	5.27	9.815	5.945	3.55
2016-12-28 08:35:00	872	15.415	11.22	5.84	5.27	9.815	5.945	3.55
2016-12-28 08:40:00	873	15.415	11.22	5.84	5.27	9.815	5.945	3.55
2016-12-28 08:45:00	874	15.33	11.22	5.84	5.27	9.815	5.945	3.55
2016-12-28 08:50:00	875	15.33	11.22	5.84	5.27	9.815	5.945	3.55
2016-12-28 08:55:00	876	15.245	11.22	5.84	5.27	9.815	5.945	3.55
2016-12-28 09:00:00	877	15.16	11.22	5.84	5.27	9.73	5.945	3.55
2016-12-28 09:05:00	878	15.16	11.22	5.84	5.355	9.815	5.945	3.55
2016-12-28 09:10:00	879	15.075	11.22	5.84	5.355	9.73	5.945	3.55
2016-12-28 09:15:00	880	15.075	11.22	5.84	5.355	9.815	5.945	3.55
2016-12-28 09:20:00	881	14.99	11.22	5.84	5.355	9.73	5.945	3.55
2016-12-28 09:25:00	882	14.99	11.22	5.84	5.355	9.73	5.945	3.55
2016-12-28 09:30:00	883	14.82	11.22	5.84	5.355	9.815	5.945	3.55
2016-12-28 09:35:00	884	14.82	11.22	5.925	5.355	9.815	5.945	3.55
2016-12-28 09:40:00	885	14.735	11.22	5.925	5.355	9.815	5.945	3.55
2016-12-28 09:45:00	886	14.735	11.22	5.925	5.355	9.815	5.945	3.55
2016-12-28 09:50:00	887	14.65	11.22	5.925	5.355	9.815	5.945	3.55
2016-12-28 09:55:00	888	14.65	11.22	5.925	5.355	9.815	5.945	3.55
2016-12-28 10:00:00	889	14.565	11.22	5.925	5.355	9.815	5.945	3.55
2016-12-28 10:05:00	890	14.48	11.22	5.925	5.355	9.815	5.945	3.55
2016-12-28 10:10:00	891	14.48	11.22	5.925	5.355	9.815	5.945	3.55
2016-12-28 10:15:00	892	14.395	11.305	5.925	5.355	9.815	5.945	3.55
2016-12-28 10:20:00	893	14.395	11.22	6.01	5.355	9.815	5.945	3.55
2016-12-28 10:25:00	894	14.31	11.22	5.925	5.355	9.815	5.945	3.55
2016-12-28 10:30:00	895	14.31	11.305	5.925	5.355	9.815	5.945	3.55
2016-12-28 10:35:00	896	14.395	11.305	5.925	5.355	9.815	5.945	3.635
2016-12-28 10:40:00	897	14.65	11.305	5.925	5.355	9.815	5.945	3.635
2016-12-28 10:45:00	898	15.075	11.305	6.01	5.355	9.815	5.945	3.635
2016-12-28 10:50:00	899	15.415	11.305	6.01	5.355	9.815	5.945	3.635
2016-12-28 10:55:00	900	15.755	11.305	6.01	5.355	9.815	5.945	3.635
2016-12-28 11:00:00	901	15.925	11.305	6.01	5.355	9.815	5.945	3.635
2016-12-28 11:05:00	902	16.01	11.39	6.01	5.355	9.815	5.945	3.635
2016-12-28 11:10:00	903	16.01	11.39	6.01	5.355	9.815	6.03	3.635
2016-12-28 11:15:00	904	16.01	11.39	6.01	5.355	9.815	6.03	3.635
2016-12-28 11:20:00	905	16.01	11.39	6.01	5.355	9.9	6.03	3.635
2016-12-28 11:25:00	906	16.01	11.39	6.01	5.355	9.815	6.03	3.635
2016-12-28 11:30:00	907	15.925	11.39	6.01	5.355	9.815	6.03	3.635
2016-12-28 11:35:00	908	15.84	11.39	6.01	5.355	9.815	6.03	3.635
2016-12-28 11:40:00	909	15.755	11.39	6.01	5.355	9.9	6.03	3.635
2016-12-28 11:45:00	910	15.755	11.39	6.01	5.355	9.9	6.03	3.635
2016-12-28 11:50:00	911	15.67	11.39	6.01	5.355	9.9	6.03	3.635
2016-12-28 11:55:00	912	15.585	11.39	6.01	5.355	9.9	6.03	3.635
2016-12-28 12:00:00	913	15.5	11.39	6.01	5.355	9.9	6.03	3.635
2016-12-28 12:05:00	914	15.415	11.39	6.01	5.355	9.9	6.03	3.635
2016-12-28 12:10:00	915	15.33	11.39	6.095	5.355	9.9	6.03	3.635
2016-12-28 12:15:00	916	15.245	11.39	6.095	5.355	9.9	6.03	3.635
2016-12-28 12:20:00	917	15.16	11.39	6.095	5.355	9.9	6.03	3.635
2016-12-28 12:25:00	918	15.075	11.39	6.095	5.355	9.9	6.03	3.635
2016-12-28 12:30:00	919	14.99	11.39	6.095	5.355	9.9	6.03	3.635
2016-12-28 12:35:00	920	14.905	11.39	6.095	5.355	9.9	6.03	3.635
2016-12-28 12:40:00	921	14.82	11.39	6.095	5.355	9.9	6.03	3.635
2016-12-28 12:45:00	922	14.735	11.39	6.095	5.355	9.9	6.03	3.635
2016-12-28 12:50:00	923	14.735	11.39	6.095	5.355	9.985	6.115	3.635
2016-12-28 12:55:00	924	14.65	11.39	6.095	5.355	9.985	6.115	3.635
2016-12-28 13:00:00	925	14.65	11.39	6.095	5.355	9.985	6.115	3.635
2016-12-28 13:05:00	926	14.65	11.39	6.095	5.355	9.985	6.115	3.72
2016-12-28 13:10:00	927	14.82	11.39	6.095	5.355	9.985	6.115	3.72
2016-12-28 13:15:00	928	15.16	11.475	6.095	5.355	9.985	6.115	3.72
2016-12-28 13:20:00	929	15.5	11.475	6.095	5.44	9.985	6.115	3.72
2016-12-28 13:25:00	930	15.67	11.475	6.095	5.44	9.985	6.115	3.72
2016-12-28 13:30:00	931	15.925	11.475	6.095	5.44	9.985	6.115	3.72
2016-12-28 13:35:00	932	16.18	11.475	6.095	5.44	9.985	6.115	3.72
2016-12-28 13:40:00	933	16.265	11.475	6.095	5.44	9.985	6.115	3.72
2016-12-28 13:45:00	934	16.265	11.475	6.095	5.44	9.985	6.115	3.72
2016-12-28 13:50:00	935	16.265	11.475	6.095	5.44	9.985	6.115	3.72
2016-12-28 13:55:00	936	16.18	11.475	6.095	5.44	9.985	6.115	3.72
2016-12-28 14:00:00	937	16.095	11.475	6.095	5.44	9.985	6.115	3.72
2016-12-28 14:05:00	938	16.01	11.475	6.095	5.44	9.985	6.115	3.72
2016-12-28 14:10:00	939	16.01	11.475	6.095	5.44	10.07	6.115	3.72
2016-12-28 14:15:00	940	15.925	11.475	6.095	5.44	10.07	6.115	3.72
2016-12-28 14:20:00	941	15.84	11.475	6.095	5.44	10.07	6.115	3.72
2016-12-28 14:25:00	942	15.67	11.475	6.18	5.44	10.07	6.115	3.72
2016-12-28 14:30:00	943	15.585	11.475	6.095	5.44	10.07	6.115	3.72
2016-12-28 14:35:00	944	15.5	11.475	6.095	5.44	10.07	6.2	3.72
2016-12-28 14:40:00	945	15.415	11.475	6.18	5.44	10.07	6.2	3.72
2016-12-28 14:45:00	946	15.33	11.475	6.18	5.44	10.07	6.2	3.72
2016-12-28 14:50:00	947	15.245	11.56	6.18	5.44	10.07	6.2	3.72
2016-12-28 14:55:00	948	15.16	11.56	6.18	5.44	10.07	6.2	3.72
2016-12-28 15:00:00	949	15.075	11.56	6.18	5.44	10.07	6.2	3.72
2016-12-28 15:05:00	950	14.99	11.56	6.18	5.44	10.07	6.2	3.72
2016-12-28 15:10:00	951	14.905	11.56	6.18	5.44	10.07	6.2	3.72
2016-12-28 15:15:00	952	14.82	11.56	6.18	5.355	10.07	6.2	3.72
2016-12-28 15:20:00	953	14.735	11.56	6.18	5.44	10.07	6.2	3.72
2016-12-28 15:25:00	954	14.65	11.56	6.18	5.355	10.07	6.2	3.72
2016-12-28 15:30:00	955	14.65	11.56	6.18	5.355	10.07	6.2	3.72
2016-12-28 15:35:00	956	14.65	11.56	6.18	5.44	10.07	6.2	3.72
2016-12-28 15:40:00	957	14.735	11.56	6.18	5.44	10.07	6.2	3.72
2016-12-28 15:45:00	958	14.905	11.56	6.18	5.44	10.07	6.2	3.72
2016-12-28 15:50:00	959	15.245	11.56	6.18	5.44	10.07	6.2	3.72
2016-12-28 15:55:00	960	15.415	11.56	6.18	5.44	10.07	6.2	3.72
2016-12-28 16:00:00	961	15.585	11.56	6.18	5.44	10.07	6.2	3.72
2016-12-28 16:05:00	962	15.755	11.56	6.18	5.44	10.07	6.2	3.72
2016-12-28 16:10:00	963	15.925	11.56	6.18	5.44	10.07	6.2	3.72
2016-12-28 16:15:00	964	16.095	11.645	6.18	5.44	10.07	6.2	3.72
2016-12-28 16:20:00	965	16.18	11.56	6.18	5.44	10.07	6.2	3.72
2016-12-28 16:25:00	966	16.265	11.56	6.18	5.44	10.07	6.2	3.72
2016-12-28 16:30:00	967	16.18	11.56	6.18	5.44	10.07	6.2	3.72
2016-12-28 16:35:00	968	16.095	11.56	6.18	5.44	10.07	6.285	3.72
2016-12-28 16:40:00	969	16.095	11.56	6.18	5.44	10.07	6.2	3.72
2016-12-28 16:45:00	970	16.01	11.56	6.18	5.44	10.07	6.2	3.72
2016-12-28 16:50:00	971	15.925	11.56	6.18	5.44	10.07	6.285	3.72
2016-12-28 16:55:00	972	15.84	11.56	6.18	5.44	10.07	6.2	3.72
2016-12-28 17:00:00	973	15.67	11.56	6.18	5.44	10.07	6.285	3.72
2016-12-28 17:05:00	974	15.67	11.56	6.18	5.44	10.07	6.285	3.72
2016-12-28 17:10:00	975	15.5	11.56	6.18	5.44	10.07	6.285	3.72
2016-12-28 17:15:00	976	15.415	11.56	6.18	5.44	10.07	6.285	3.72
2016-12-28 17:20:00	977	15.33	11.56	6.18	5.44	10.07	6.285	3.72
2016-12-28 17:25:00	978	15.245	11.56	6.18	5.44	10.07	6.285	3.72
2016-12-28 17:30:00	979	15.16	11.56	6.18	5.44	10.07	6.285	3.72
2016-12-28 17:35:00	980	15.075	11.56	6.18	5.355	10.155	6.285	3.72
2016-12-28 17:40:00	981	14.99	11.56	6.18	5.44	10.155	6.285	3.72
2016-12-28 17:45:00	982	14.905	11.56	6.18	5.355	10.155	6.285	3.72
2016-12-28 17:50:00	983	14.82	11.56	6.18	5.355	10.155	6.285	3.72
2016-12-28 17:55:00	984	14.735	11.56	6.18	5.44	10.155	6.285	3.72
2016-12-28 18:00:00	985	14.735	11.56	6.18	5.355	10.155	6.285	3.72
2016-12-28 18:05:00	986	14.735	11.56	6.18	5.355	10.155	6.285	3.72
2016-12-28 18:10:00	987	14.735	11.56	6.18	5.355	10.155	6.285	3.72
2016-12-28 18:15:00	988	14.82	11.56	6.18	5.44	10.155	6.285	3.72
2016-12-28 18:20:00	989	14.905	11.56	6.18	5.44	10.155	6.285	3.72
2016-12-28 18:25:00	990	15.16	11.56	6.18	5.44	10.155	6.285	3.72
2016-12-28 18:30:00	991	15.33	11.56	6.18	5.44	10.155	6.285	3.72
2016-12-28 18:35:00	992	15.415	11.56	6.18	5.44	10.155	6.285	3.72
2016-12-28 18:40:00	993	15.585	11.56	6.18	5.44	10.155	6.285	3.72
2016-12-28 18:45:00	994	15.67	11.645	6.18	5.44	10.155	6.285	3.72
2016-12-28 18:50:00	995	15.84	11.645	6.18	5.44	10.155	6.285	3.72
2016-12-28 18:55:00	996	16.01	11.645	6.18	5.44	10.155	6.285	3.72
2016-12-28 19:00:00	997	16.095	11.645	6.18	5.44	10.155	6.285	3.72
2016-12-28 19:05:00	998	16.18	11.645	6.18	5.44	10.155	6.285	3.72
2016-12-28 19:10:00	999	16.265	11.645	6.18	5.44	10.155	6.285	3.72
2016-12-28 19:15:00	1000	16.18	11.645	6.18	5.44	10.155	6.285	3.72
2016-12-28 19:20:00	1001	16.18	11.645	6.18	5.44	10.155	6.285	3.72
2016-12-28 19:25:00	1002	16.095	11.645	6.18	5.44	10.155	6.285	3.72
2016-12-28 19:30:00	1003	16.01	11.645	6.18	5.44	10.155	6.285	3.72
2016-12-28 19:35:00	1004	16.01	11.645	6.18	5.44	10.155	6.285	3.805
2016-12-28 19:40:00	1005	15.925	11.645	6.18	5.44	10.155	6.285	3.72
2016-12-28 19:45:00	1006	15.84	11.56	6.18	5.44	10.155	6.285	3.72
2016-12-28 19:50:00	1007	15.755	11.645	6.18	5.44	10.155	6.285	3.72
2016-12-28 19:55:00	1008	15.67	11.56	6.18	5.44	10.155	6.285	3.72
2016-12-28 20:00:00	1009	15.585	11.56	6.18	5.44	10.155	6.285	3.72
2016-12-28 20:05:00	1010	15.5	11.56	6.18	5.44	10.155	6.285	3.72
2016-12-28 20:10:00	1011	15.415	11.56	6.18	5.44	10.155	6.285	3.72
2016-12-28 20:15:00	1012	15.33	11.56	6.18	5.355	10.155	6.285	3.72
2016-12-28 20:20:00	1013	15.245	11.56	6.18	5.44	10.155	6.285	3.72
2016-12-28 20:25:00	1014	15.16	11.56	6.18	5.44	10.155	6.285	3.72
2016-12-28 20:30:00	1015	15.075	11.56	6.18	5.355	10.155	6.285	3.72
2016-12-28 20:35:00	1016	15.075	11.56	6.18	5.44	10.155	6.285	3.805
2016-12-28 20:40:00	1017	15.075	11.56	6.18	5.355	10.155	6.285	3.805
2016-12-28 20:45:00	1018	15.16	11.56	6.18	5.44	10.155	6.285	3.805
2016-12-28 20:50:00	1019	15.245	11.645	6.18	5.44	10.155	6.285	3.805
2016-12-28 20:55:00	1020	15.245	11.645	6.18	5.355	10.155	6.285	3.805
2016-12-28 21:00:00	1021	15.415	11.645	6.18	5.44	10.155	6.285	3.805
2016-12-28 21:05:00	1022	15.5	11.645	6.18	5.44	10.155	6.285	3.805
2016-12-28 21:10:00	1023	15.67	11.645	6.18	5.44	10.155	6.285	3.805
2016-12-28 21:15:00	1024	15.755	11.645	6.18	5.44	10.155	6.285	3.805

## Sheet: FFT results for each sensor
No.	Frequency	water source	H1(3cm)	H2(6cm)	H3(12cm)	V1(3cm)	V2(6cm)	V3(17cm)
1	0	0	0	0	0	0	0	0
2	3.25839e-06	20.9989	49.0747	25.2845	20.3702	1.41705	18.0379	11.0623
3	6.51678e-06	68.4991	43.1198	22.9896	18.0248	13.7311	8.5918	8.27166
4	9.77517e-06	224.694	83.1701	58.4256	48.5555	51.3477	29.3549	28.441
5	1.30336e-05	298.587	83.7899	72.3481	63.6926	74.8711	31.2905	45.6866
6	1.6292e-05	88.4415	21.7351	20.1631	17.4395	24.8262	13.0195	15.6695
7	1.95503e-05	47.2989	8.83248	12.8538	12.8071	15.833	5.35289	9.45724
8	2.28087e-05	159.084	18.8547	14.7652	12.8592	11.6906	8.57552	2.17839
9	2.60671e-05	59.9097	7.57554	9.79924	5.73839	11.2201	10.1744	6.63092
10	2.93255e-05	38.9162	5.33659	6.60938	5.18467	8.64831	4.89342	5.17024
11	3.25839e-05	27.1783	5.72373	10.3197	6.45301	11.2556	4.21159	1.35527
12	3.58423e-05	41.8493	8.50171	9.90466	8.88556	6.75858	8.41196	6.62428
13	3.91007e-05	23.5592	4.73211	4.01688	5.19268	5.1639	4.28375	5.63185
14	4.23591e-05	21.8704	3.42879	7.32557	5.64141	5.35868	3.35026	6.58422
15	4.56175e-05	38.3543	7.21388	8.57325	8.35932	9.20694	2.3895	5.33772
16	4.88759e-05	37.7554	5.18517	3.82793	3.84751	4.41615	5.61487	5.98093
17	5.21343e-05	32.892	3.38386	6.07034	4.39933	3.08539	4.14234	6.08734
18	5.53926e-05	40.4672	3.73568	4.153	4.3931	4.78429	4.02399	4.82769
19	5.8651e-05	16.2555	1.86582	1.31833	3.5829	2.36201	7.01671	2.55257
20	6.19094e-05	13.6725	2.35814	0.86677	3.49457	2.71644	2.89412	3.82997
21	6.51678e-05	15.596	2.76839	5.38096	2.10302	3.06409	1.67342	3.26512
22	6.84262e-05	1.14208	5.51697	2.52978	5.84894	4.41112	4.04222	1.20558
23	7.16846e-05	24.2473	0.338359	1.66513	0.64343	2.98887	3.90591	2.64198
24	7.4943e-05	24.4384	1.43613	2.62724	1.29424	1.74068	3.01228	1.74953
25	7.82014e-05	32.7158	1.93105	1.80955	2.13667	3.37411	5.08781	4.66871
26	8.14598e-05	46.3957	1.41842	1.43099	4.35967	1.93389	2.13755	2.12568
27	8.47182e-05	6.00165	1.12741	1.14123	1.89769	1.52119	0.388861	4.17523
28	8.79765e-05	15.9825	1.56023	1.47542	1.87976	2.33614	2.19926	3.35543
29	9.12349e-05	35.8915	2.67548	3.85882	1.94459	3.48064	2.87479	5.10101
30	9.44933e-05	15.5747	2.72434	1.51053	4.06246	3.27144	1.62543	2.99334
31	9.77517e-05	8.81782	0.879989	1.11869	1.80775	2.37922	2.0261	1.87972
32	0.00010101	33.1153	1.18304	4.1347	1.60474	3.89762	1.57316	1.53354
33	0.000104269	197.665	4.85927	2.54538	4.88884	2.93496	2.09774	2.30088
34	0.000107527	34.8737	1.51311	2.46272	0.662884	0.371094	0.410633	2.8131
35	0.000110785	37.1906	3.04526	3.17525	1.26476	2.18101	1.84693	1.34074
36	0.000114044	117.19	2.3663	2.97182	3.02176	4.09186	2.3299	4.64256
37	0.000117302	91.3725	2.84009	0.783173	1.28577	3.75098	2.19278	3.10691
38	0.00012056	28.5456	0.661034	0.687113	1.81265	2.44216	1.7393	2.38808
39	0.000123819	16.2014	0.859968	1.15497	1.00342	2.48892	1.08891	2.47135
40	0.000127077	22.7627	1.64553	1.74143	2.05081	1.97073	1.06401	2.49766
41	0.000130336	5.62103	0.592315	2.77125	0.696444	1.23615	0.811963	1.04369
42	0.000133594	2.85368	3.339	2.12543	0.571825	1.61858	0.478321	3.97659
43	0.000136852	8.55762	1.83345	2.46193	1.31193	1.58373	1.52928	1.22104
44	0.000140111	24.3401	0.831283	1.11867	1.47751	2.9268	2.39998	1.14708
45	0.000143369	9.78743	1.37497	0.167435	3.18881	2.48404	0.841599	1.58211
46	0.000146628	9.35185	1.3913	0.578377	1.87696	2.9601	0.556031	2.4312
47	0.000149886	10.433	2.21556	1.95515	1.34309	3.80693	1.7888	0.532947
48	0.000153144	6.80309	1.94302	0.537201	1.03087	2.0125	1.31028	1.43595
49	0.000156403	9.37151	1.13358	0.244168	2.76799	1.2774	1.88162	0.907486
50	0.000159661	5.75126	0.615801	1.1254	0.409744	0.388235	0.907931	2.13312
51	0.00016292	8.66358	2.34017	1.21303	1.57168	0.818851	1.81555	2.13193
52	0.000166178	6.92291	1.78746	1.28522	0.305407	1.2651	1.07346	1.34056
53	0.000169436	4.86717	1.67477	2.45267	1.3552	1.18293	1.08197	0.910672
54	0.000172695	12.9014	0.722064	0.690147	1.13015	1.70331	0.62257	2.40875
55	0.000175953	10.8447	1.73016	0.667565	0.893928	3.26764	0.472981	0.326223
56	0.000179211	11.448	2.01562	1.57225	0.169524	1.7355	0.772789	0.971859
57	0.00018247	10.396	2.19592	1.95727	1.30006	1.88139	1.26686	2.39493
58	0.000185728	3.66934	1.42543	0.47804	1.24601	2.83073	1.81385	1.49103
59	0.000188987	5.30271	2.48069	1.57383	1.99188	0.589839	1.53168	1.3365
60	0.000192245	5.74299	2.03466	3.64494	0.956357	0.674185	1.0141	2.05215
61	0.000195503	7.26048	1.50216	0.88432	2.14439	2.46942	0.689219	0.60062
62	0.000198762	13.9054	3.04961	1.67568	0.48859	0.642581	2.49961	1.93986
63	0.00020202	11.3192	0.0480934	0.234598	2.9846	0.571374	0.649289	0.73215
64	0.000205279	18.4538	1.71332	1.42967	3.40089	1.36399	1.15754	1.2028
65	0.000208537	35.1554	1.18283	2.42196	0.540244	3.71587	1.57934	2.12522
66	0.000211795	11.1673	0.599324	2.87884	1.4685	2.22207	1.17687	1.69396
67	0.000215054	10.7151	2.03872	1.19823	0.94055	1.14503	1.26702	0.267744
68	0.000218312	56.7612	2.53129	0.393513	2.2617	1.63971	1.6152	1.31796
69	0.000221571	35.6937	1.52	1.50027	0.7287	2.21164	2.39089	2.38207
70	0.000224829	13.7478	1.2046	3.54789	2.38239	1.08548	0.535969	2.37871
71	0.000228087	6.40518	1.52639	0.235727	1.59365	1.79253	1.60508	0.470438
72	0.000231346	38.1509	1.84578	0.76347	0.60871	1.25477	1.93365	1.0184
73	0.000234604	7.83461	1.45911	2.18606	1.39774	1.62043	1.04323	1.28599
74	0.000237863	4.33564	3.70328	0.777391	1.73857	0.203245	1.43967	1.34116
75	0.000241121	4.18828	0.883662	1.46393	0.83093	1.03734	0.893123	0.323215
76	0.000244379	9.09975	1.4111	1.7966	0.618831	0.494189	1.81626	1.06005
77	0.000247638	4.72835	0.728269	1.87604	1.01506	0.500984	0.0937369	1.77368
78	0.000250896	4.74291	1.51194	1.35123	1.67596	0.89168	0.816555	2.62283
79	0.000254154	9.01147	2.15345	0.879316	0.409712	1.04717	0.533745	1.53263
80	0.000257413	5.20776	0.982474	0.927431	0.813724	1.27864	1.06338	1.42419
81	0.000260671	6.12272	2.03613	1.75816	0.784268	0.737145	0.850547	1.1037
82	0.00026393	2.05213	1.56978	1.19962	1.60145	1.65572	0.726716	0.296359
83	0.000267188	7.26121	1.82667	1.33721	0.68897	1.15266	0.763158	1.03774
84	0.000270446	5.70741	2.34844	1.05239	0.882297	0.841675	0.779688	1.33313
85	0.000273705	3.97188	0.687021	0.976244	0.740433	0.476476	0.724081	0.49386
86	0.000276963	2.22757	0.380827	1.04261	1.07059	1.2053	0.668254	0.355599
87	0.000280222	5.27314	1.27979	1.61955	1.0654	0.682333	1.13165	0.470413
88	0.00028348	5.43285	1.74654	1.28084	0.372424	0.780996	1.32619	0.490016
89	0.000286738	3.55785	0.504272	0.92053	0.301635	0.824007	0.158847	1.09691
90	0.000289997	7.32444	1.12014	0.447686	0.248367	0.482978	0.831061	0.685028
91	0.000293255	3.3897	1.028	1.91692	1.30322	0.634101	0.912279	1.20013
92	0.000296514	4.75409	0.84144	0.667623	1.77449	0.557452	0.902533	0.948307
93	0.000299772	7.99354	1.68768	0.415165	0.518429	0.965134	0.297296	0.860524
94	0.00030303	5.20301	1.54035	0.787871	0.858835	1.73008	1.02082	0.255055
95	0.000306289	5.81232	1.22795	0.620233	0.846382	0.828001	0.99081	0.285909
96	0.000309547	6.3913	0.826024	0.65359	0.500027	1.26193	0.552713	0.260068
97	0.000312806	3.56389	0.917635	0.878548	1.52378	0.609562	0.849328	0.745755
98	0.000316064	3.58258	0.633572	0.576588	0.751149	1.07894	0.395121	0.451787
99	0.000319322	1.37332	1.45309	1.02514	0.307701	0.856193	0.427612	0.695656
100	0.000322581	25.7199	0.373897	0.660592	0.788102	0.59107	1.04173	0.686361
101	0.000325839	12.8245	1.55325	0.500338	0.346832	0.82456	0.595342	0.146768
102	0.000329097	5.02295	0.637873	0.119561	0.921242	0.398516	0.897772	0.896237
103	0.000332356	1.63468	0.8638	0.631079	1.44662	1.24293	1.4484	0.479243
104	0.000335614	34.956	2.46064	0.848041	1.0108	0.478213	1.62332	0.493301
105	0.000338873	7.50464	1.29466	0.589712	0.98834	1.76389	0.423938	0.593428
106	0.000342131	4.44728	0.963286	0.959195	0.459977	0.481078	0.782737	0.86771
107	0.000345389	6.26475	1.39015	0.418332	0.796969	1.37098	0.422734	0.198132
108	0.000348648	6.79755	1.04315	0.258099	0.963844	0.993367	0.665951	0.438189
109	0.000351906	2.2294	0.581552	0.27754	0.326468	0.81353	0.638888	1.33811
110	0.000355165	3.61232	1.07139	0.669198	0.918571	0.788131	1.0267	0.62673
111	0.000358423	7.90305	0.848511	0.224041	0.419983	0.852306	0.533177	0.966487
112	0.000361681	3.15246	1.36435	0.379746	0.257369	0.676443	0.207469	0.339541
113	0.00036494	5.33725	1.55119	0.606968	0.733447	1.0816	0.0309896	0.571065
114	0.000368198	2.60964	1.37506	0.951782	0.793332	0.39487	1.05049	0.511677
115	0.000371457	4.12663	0.827269	0.234322	0.349344	0.657764	0.990765	0.278027
116	0.000374715	4.73685	0.609251	1.21051	0.876915	0.86894	0.833217	0.327208
117	0.000377973	2.77066	0.47145	0.657359	0.294548	1.62902	0.432487	1.24394
118	0.000381232	3.35585	0.782711	1.3321	1.21055	0.501154	0.244398	0.569392
119	0.00038449	4.63764	0.66711	0.715584	1.477	0.586986	0.282123	1.23264
120	0.000387748	2.68653	0.221688	0.608962	1.19122	0.774828	0.107005	0.57692
121	0.000391007	2.67102	1.11353	0.701043	0.403811	1.17436	1.3243	0.331243
122	0.000394265	3.81187	1.54037	0.220168	0.60186	0.330077	1.2626	0.97083
123	0.000397524	2.72196	0.888845	0.227018	0.646684	0.283855	0.376152	1.16798
124	0.000400782	2.16274	1.10504	1.1005	0.978183	0.292778	0.26788	1.43622
125	0.00040404	3.11278	0.181504	0.988785	0.389567	0.703272	0.410359	0.258351
126	0.000407299	4.50382	0.768952	0.897881	0.784335	0.72988	0.244368	0.237564
127	0.000410557	3.97717	0.55137	0.596399	1.18326	0.20978	0.306182	0.202618
128	0.000413816	3.02646	0.379467	1.02608	1.04473	0.337952	0.815657	0.46463
129	0.000417074	6.68975	1.13816	1.51159	0.523772	0.871335	0.329204	0.268794
130	0.000420332	3.29686	0.473648	0.860094	0.494072	0.936484	0.406605	1.06499
131	0.000423591	1.79713	1.04536	0.325522	0.598162	1.13179	0.629363	0.186851
132	0.000426849	7.62004	0.61716	0.743387	0.503224	0.351961	0.408509	0.653981
133	0.000430108	1.92481	0.87423	0.62274	0.367791	0.634314	0.206917	0.777759
134	0.000433366	0.171648	0.650817	0.795396	0.14991	0.376684	0.725955	0.370138
135	0.000436624	4.67435	0.101555	0.654479	1.07849	1.49623	0.278801	0.239435
136	0.000439883	21.6311	0.945087	0.523453	1.25873	0.36265	0.359925	0.867668
137	0.000443141	5.96189	0.738759	0.838863	0.0354268	0.486338	0.0775415	0.512666
138	0.0004464	5.00098	0.654938	0.784322	0.709546	0.443231	0.527805	0.620516
139	0.000449658	10.626	0.828798	0.992529	0.6367	0.679611	0.424031	0.230637
140	0.000452916	11.6606	0.82857	0.60944	0.278926	0.475596	0.298565	0.543638
141	0.000456175	3.42973	0.979075	0.628155	0.575689	0.512019	0.356389	0.595979
142	0.000459433	3.98259	0.63327	0.70311	0.463451	0.494771	0.0843719	0.336906
143	0.000462691	3.09814	0.86892	0.693848	0.0393267	0.293145	0.766194	0.412834
144	0.00046595	1.66946	0.209161	0.576768	1.77821	0.27631	0.443505	0.410395
145	0.000469208	3.11826	0.854965	0.635523	0.429106	0.371861	0.662803	0.353991
146	0.000472467	2.60529	0.582332	1.44146	0.199954	1.25293	0.266596	0.586658
147	0.000475725	3.98921	0.763913	0.932224	0.495737	0.803555	0.49911	0.035794
148	0.000478983	2.66606	0.509713	1.03084	0.220578	1.26305	0.350704	1.01242
149	0.000482242	3.16081	0.0429466	0.559807	0.7249	0.42116	0.171711	0.58742
150	0.0004855	2.64453	0.570717	0.387908	0.33787	0.433607	0.699716	0.892702
151	0.000488759	4.77714	0.639269	1.22413	0.894586	0.541146	0.0908798	0.297236
152	0.000492017	2.02406	0.503184	0.373376	0.594221	0.853154	0.649424	0.50837
153	0.000495275	2.03692	0.225703	1.13877	1.22317	0.56088	0.126223	0.141834
154	0.000498534	2.93027	0.873128	0.327581	0.768586	0.760012	0.763635	0.679123
155	0.000501792	0.87096	0.583154	0.622548	0.713355	0.297198	0.518326	0.387261
156	0.000505051	1.12025	0.97567	0.491317	0.526839	0.459721	0.657518	0.743953
157	0.000508309	0.751908	0.510788	0.123894	0.274335	0.737038	0.53541	0.638632
158	0.000511567	4.25934	0.878351	0.469672	0.163653	1.16825	0.664838	0.312956
159	0.000514826	3.77714	0.533406	0.324621	1.27513	0.103892	0.571372	0.0729774
160	0.000518084	3.63824	0.67161	0.502419	0.309016	0.448227	0.798632	0.374496
161	0.000521343	3.87678	0.546705	0.282364	0.566263	0.120625	0.230402	0.149977
162	0.000524601	2.47807	0.843762	0.147534	0.941924	0.310391	0.260863	0.728493
163	0.000527859	2.0083	0.593367	0.0859793	0.486488	0.726474	0.457924	1.42858
164	0.000531118	0.451702	0.901083	0.532175	0.552917	0.486072	0.348554	1.03323
165	0.000534376	4.1242	1.57848	0.142088	0.593608	1.20711	0.329465	0.535477
166	0.000537634	2.49385	0.6294	0.530933	0.972777	0.405804	0.318146	0.783326
167	0.000540893	3.79384	0.53208	0.849016	0.440942	0.465542	0.389624	0.200438
168	0.000544151	8.37491	0.159551	0.39083	0.0889307	1.15764	0.595207	0.904726
169	0.00054741	4.14939	0.278179	0.751401	0.177783	0.63042	0.178493	0.87204
170	0.000550668	2.99863	0.402074	0.17293	0.653829	0.832178	0.17134	0.543596
171	0.000553926	9.30617	0.278165	0.343022	0.243166	0.31506	0.435011	0.924284
172	0.000557185	10.4692	0.924439	1.04592	0.182629	0.463826	0.339892	0.549421
173	0.000560443	4.56477	0.583224	1.63455	0.713678	0.673308	0.197345	0.660292
174	0.000563702	5.265	0.640167	0.287698	0.913265	0.0837659	0.252898	0.667828
175	0.00056696	8.17716	0.290047	0.39783	0.84978	0.208141	0.0680926	0.140664
176	0.000570218	0.741838	1.11128	0.706561	0.706227	0.669141	0.847951	0.632734
177	0.000573477	2.96741	0.483801	0.144058	0.499563	0.257203	0.0318068	0.500965
178	0.000576735	1.8928	0.256537	0.473315	0.332707	0.465251	0.483203	0.821575
179	0.000579994	3.64189	0.397177	0.549497	0.821534	0.147533	0.309094	0.16651
180	0.000583252	3.27252	0.839952	0.0756868	0.755149	0.272698	0.2901	0.193
181	0.00058651	2.47761	0.853872	0.613679	0.280973	0.921033	0.348605	0.473079
182	0.000589769	2.50389	0.570422	0.444714	0.197016	0.414804	0.550632	0.561699
183	0.000593027	1.0095	0.528066	0.32812	0.72605	0.520102	0.704283	0.728009
184	0.000596285	2.56	1.06766	0.71653	0.633916	0.586715	0.187531	0.55719
185	0.000599544	1.3543	0.0760461	0.350968	0.585498	0.751712	0.46087	0.196544
186	0.000602802	3.67279	0.321224	0.117736	0.713068	0.607336	0.645557	0.663371
187	0.000606061	1.98627	0.76587	0.448611	0.965492	0.515313	0.756465	0.700764
188	0.000609319	2.13319	0.903931	0.698057	0.167654	0.429547	0.616701	0.115713
189	0.000612577	2.45281	1.14575	0.461722	0.329464	0.326385	0.808016	0.542662
190	0.000615836	2.40501	0.737289	0.509163	0.884837	0.470438	0.51422	0.88775
191	0.000619094	3.35575	0.231643	0.658092	0.289001	0.513067	0.2484	0.395362
192	0.000622353	1.4862	0.553184	0.429338	0.198971	0.0571559	0.148773	0.16213
193	0.000625611	3.25048	0.475292	0.856423	0.951814	0.194037	0.366214	0.76407
194	0.000628869	1.53277	0.917775	0.332511	0.638711	0.668285	0.691743	0.14415
195	0.000632128	2.92889	0.0597475	0.435457	0.58099	0.578186	0.287218	0.433886
196	0.000635386	1.82299	0.874763	0.157169	0.494884	0.290525	0.156314	0.324845
197	0.000638645	3.43181	0.7158	0.439874	0.588447	0.213863	0.565211	0.546655
198	0.000641903	2.89376	0.896624	0.340345	0.186037	0.437045	0.466526	0.183098
199	0.000645161	3.28179	0.436131	0.41259	0.943291	0.573715	0.19346	0.642323
200	0.00064842	1.69783	1.03723	0.783959	0.615995	0.460917	0.635391	0.518035
201	0.000651678	2.21583	0.563268	0.53455	0.540615	0.500177	0.554444	0.964869
202	0.000654937	1.71668	0.624578	0.329747	0.62508	0.247283	0.344974	0.7318
203	0.000658195	5.51342	0.788507	0.499683	0.703013	0.478247	0.0528893	0.516725
204	0.000661453	6.27012	0.665817	1.08391	0.680916	0.704684	0.360303	0.229948
205	0.000664712	3.17532	0.764173	0.622233	0.435304	0.315541	0.701324	0.40812
206	0.00066797	3.8273	1.10546	0.696145	0.656156	0.444426	0.7624	0.367216
207	0.000671228	9.70317	0.98714	0.254191	0.36596	0.729442	0.694147	0.428096
208	0.000674487	3.43129	0.648355	0.794446	0.319892	0.240507	0.455634	0.815065
209	0.000677745	3.04884	0.514403	0.553645	1.08386	0.870658	0.312484	0.312662
210	0.000681004	2.42875	0.975282	0.286389	0.50826	0.442846	0.520989	0.912213
211	0.000684262	2.91501	0.525356	1.1324	0.304683	0.136499	0.345439	0.527648
212	0.00068752	2.12956	0.421017	0.587356	1.04388	0.736343	0.504054	0.219909
213	0.000690779	1.9509	0.505855	0.548725	0.146692	0.488878	0.2609	1.15737
214	0.000694037	3.97916	0.261714	0.267233	1.09576	0.333962	0.37576	0.321414
215	0.000697296	1.35773	0.68616	0.124924	0.383713	0.519321	0.412618	0.490492
216	0.000700554	1.18639	0.398354	0.543057	0.598346	0.770148	0.262151	0.782885
217	0.000703812	1.26554	0.497906	0.0918765	0.433554	0.48428	0.606835	0.312062
218	0.000707071	3.04526	0.984221	0.601232	0.302273	0.896478	0.460423	0.1939
219	0.000710329	2.68915	0.643425	0.432912	0.237124	0.186973	0.374975	0.249293
220	0.000713588	3.56895	0.574875	0.227322	0.481004	1.14963	0.477765	0.286902
221	0.000716846	1.66032	0.363802	0.719198	0.308101	0.107603	0.555504	0.626629
222	0.000720104	1.12084	0.400829	0.586342	0.456601	0.253791	0.540205	0.154599
223	0.000723363	0.402398	0.463193	0.308921	0.502662	0.47481	0.327383	0.844702
224	0.000726621	2.25361	0.242154	0.463692	0.655878	0.536742	0.304991	0.269865
225	0.00072988	3.66103	0.45796	0.316689	0.146288	0.288356	0.0659351	0.336396
226	0.000733138	2.58405	0.462415	0.745954	0.515107	0.542813	0.479664	0.390584
227	0.000736396	1.87422	1.02013	0.27859	1.07482	0.530908	0.0950152	0.520055
228	0.000739655	1.82675	0.448396	0.884276	0.514354	0.369153	0.528137	0.242784
229	0.000742913	3.40334	0.445844	0.455017	0.897989	0.660943	0.7542	0.640027
230	0.000746171	2.04615	0.613186	0.463386	0.718679	0.550548	0.342686	0.14108
231	0.00074943	1.86225	0.342792	0.418466	0.549733	0.170245	0.312551	0.266947
232	0.000752688	3.79681	0.527436	0.518561	0.179891	0.231375	0.467079	0.141836
233	0.000755947	1.2384	0.538502	0.361926	0.266262	0.315678	0.508935	0.30374
234	0.000759205	1.14133	0.645515	0.469318	0.310516	0.520392	0.761071	0.849986
235	0.000762463	2.44289	0.657329	0.685008	0.642154	0.393135	0.918945	0.313541
236	0.000765722	4.3524	0.852777	0.764669	0.386374	0.78545	0.821258	0.303681
237	0.00076898	1.85316	0.208925	0.770298	0.740717	0.7221	0.0962112	0.194721
238	0.000772239	2.80428	0.22562	0.464793	0.571778	0.483774	0.452171	0.33758
239	0.000775497	8.21549	0.933072	0.297164	0.581262	0.407066	0.380051	0.430567
240	0.000778755	2.97764	0.716542	0.319757	0.274163	0.542039	0.628806	0.487663
241	0.000782014	3.06737	0.974099	0.492743	0.837535	0.43466	0.486792	0.661603
242	0.000785272	4.83421	1.39817	0.233827	0.360675	0.171872	0.355062	0.258357
243	0.000788531	4.05772	0.664299	0.953307	0.178935	0.142692	0.550466	0.0983319
244	0.000791789	1.90441	0.270645	0.239687	0.491642	0.182412	0.485164	0.199366
245	0.000795047	2.6321	0.816691	0.40977	0.568964	0.437779	0.305255	0.682667
246	0.000798306	2.73327	0.139483	0.477766	0.468027	0.447877	0.319829	0.507541
247	0.000801564	2.2022	0.494663	0.118883	0.449971	0.573309	0.361275	0.607963
248	0.000804822	2.60489	0.994389	0.194047	0.371844	0.415397	0.353314	0.263837
249	0.000808081	2.06416	0.653307	0.0329095	0.839956	0.438568	0.400663	0.55644
250	0.000811339	2.06459	0.642161	0.542586	0.55379	0.41621	0.190787	0.389944
251	0.000814598	2.061	0.796743	0.215486	0.354287	0.18683	0.429497	0.294411
252	0.000817856	1.12345	0.460551	0.173634	0.178336	0.512561	0.520184	0.398386
253	0.000821114	1.51264	0.69514	0.539489	0.892149	0.630927	0.0858492	0.548742
254	0.000824373	2.49816	0.799253	0.0662698	0.695321	0.525505	0.158609	0.428943
255	0.000827631	0.351181	0.237462	0.865415	0.973067	0.418034	0.413652	0.622643
256	0.00083089	2.35986	0.445214	0.5335	0.655411	0.450045	0.319734	0.63667
257	0.000834148	1.87193	1.30025	0.17	0.425	1.105	0.517035	0.380132
258	0.000837406	1.17863	0.897581	0.479702	0.699082	0.21105	0.177794	0.997143
259	0.000840665	1.48831	0.643223	0.27641	0.200777	0.459351	0.194336	0.402077
260	0.000843923	2.17784	0.179571	0.0214841	0.309876	0.442204	0.284886	0.470569
261	0.000847182	2.11846	0.611474	0.383124	0.28778	0.369656	0.425603	0.147666
262	0.00085044	1.25341	0.232186	0.399401	0.424435	0.564405	0.650313	0.395943
263	0.000853698	0.406156	0.752034	0.256956	0.645905	0.47975	0.319817	0.28828
264	0.000856957	2.55815	0.219495	0.190557	0.423734	0.149196	0.422829	0.239787
265	0.000860215	1.3891	0.437252	0.422189	0.119986	0.486693	0.625407	0.366271
266	0.000863474	1.68174	1.07281	0.71293	0.624336	0.0503438	0.225736	0.779565
267	0.000866732	0.741762	0.369419	0.27347	0.812462	0.134883	0.386044	0.80106
268	0.00086999	1.55681	0.475392	0.498773	0.382429	0.612875	0.110996	0.641056
269	0.000873249	1.50599	0.340295	0.343404	0.30389	0.652523	0.179132	0.244923
270	0.000876507	1.65347	0.425902	0.697694	0.429044	0.47772	0.362208	0.689593
271	0.000879765	5.36941	0.683923	0.771624	0.578245	0.444232	0.570652	0.495099
272	0.000883024	2.94323	0.474329	0.290847	0.297063	0.651627	0.267731	0.423441
273	0.000886282	2.7283	1.46459	0.323943	0.192686	0.381629	0.137664	0.70472
274	0.000889541	5.25436	0.577678	0.565887	0.578245	0.0742505	0.233392	0.561052
275	0.000892799	4.54989	0.0923888	0.223556	0.105671	0.188421	0.427608	0.193733
276	0.000896057	1.59016	0.421532	0.175616	0.202738	0.445565	0.429954	0.490302
277	0.000899316	1.7704	0.369392	0.32666	0.428219	0.505831	0.465907	0.0861871
278	0.000902574	1.99216	0.743017	0.32264	0.500605	0.534236	0.21015	1.14617
279	0.000905833	1.53301	0.66796	0.525063	0.831101	0.372853	0.373229	0.323772
280	0.000909091	1.95699	0.55127	0.134466	0.522937	0.522703	0.0532566	0.453783
281	0.000912349	1.50058	1.22295	0.796348	0.511546	0.0783782	0.481407	0.913586
282	0.000915608	1.66057	0.239452	0.0753641	0.552036	0.607077	0.498809	0.551638
283	0.000918866	1.81427	0.545392	0.51226	0.132647	0.310193	0.308538	0.483443
284	0.000922125	1.64191	0.169523	0.125597	0.623212	0.310255	0.342131	0.335679
285	0.000925383	2.51283	0.443307	0.457032	0.430605	0.369418	0.261287	0.245549
286	0.000928641	1.38813	0.463079	0.453342	0.46573	0.397013	0.335938	0.558508
287	0.0009319	1.25188	0.600696	0.172391	0.2693	0.594473	0.315848	0.546357
288	0.000935158	0.870253	0.327945	0.519368	0.250877	0.882253	0.749868	0.382643
289	0.000938417	1.95064	0.754648	0.241714	0.595423	0.439531	0.490412	0.0746785
290	0.000941675	1.76058	1.02231	0.444755	0.748943	0.751968	0.036823	0.30681
291	0.000944933	2.01889	0.582458	0.32465	0.685609	0.102616	0.637352	0.252748
292	0.000948192	2.09541	0.351277	0.570385	0.124198	0.185909	0.587893	0.300995
293	0.00095145	1.16565	0.365163	0.302244	0.214261	0.799189	0.200953	0.521119
294	0.000954708	1.7055	0.352793	0.266623	0.620139	0.226153	0.316621	0.27721
295	0.000957967	1.97738	0.326709	0.344647	0.597476	0.170031	0.395072	0.350375
296	0.000961225	0.968654	1.03856	0.504202	0.680639	0.125906	0.246029	0.425694
297	0.000964484	0.0745762	0.421079	0.257423	0.433218	0.366575	0.230168	0.31251
298	0.000967742	1.73421	0.707045	0.0449238	0.615666	0.65941	0.367512	0.284531
299	0.000971	2.24404	0.234381	0.246428	0.401336	0.448711	0.677547	0.689837
300	0.000974259	2.02071	0.429794	0.400292	0.457686	0.35939	0.226656	0.338464
301	0.000977517	1.71654	0.356648	0.244941	0.58584	0.227477	0.307548	0.153173
302	0.000980776	0.901491	0.497327	0.418511	0.362622	0.800656	0.447267	0.366154
303	0.000984034	1.72643	1.33385	0.472883	0.203963	0.18692	0.140468	0.49877
304	0.000987292	1.55948	0.0843906	0.188291	0.801381	0.424707	0.178958	0.113452
305	0.000990551	3.38853	0.316268	0.49226	0.647491	0.604029	0.621592	0.391644
306	0.000993809	3.4375	0.813478	0.685	0.248261	0.906513	0.242855	0.294041
307	0.000997068	3.60454	0.538476	0.0834686	0.691711	0.49132	0.590176	0.651445
308	0.00100033	2.15552	0.396742	0.515269	0.799704	0.410013	0.150629	0.36995
309	0.00100358	2.48576	0.183864	0.425523	0.283926	0.55639	0.288312	0.554306
310	0.00100684	3.23475	1.43306	0.519523	0.448609	0.272828	0.262585	0.75244
311	0.0010101	1.68407	0.313071	0.202818	0.482934	0.204549	0.457413	0.821554
312	0.00101336	1.26328	0.523034	0.186168	0.0301903	0.521756	0.385594	0.406833
313	0.00101662	1.62702	0.201307	0.399022	0.726702	0.409402	0.451902	0.867401
314	0.00101988	0.906052	1.08895	0.3018	0.463194	0.54885	0.189041	0.0870097
315	0.00102313	1.68306	0.292228	0.112461	0.591734	0.541601	0.330821	0.673828
316	0.00102639	1.44398	0.127036	0.229914	0.384659	0.426772	0.151675	0.34499
317	0.00102965	2.559	0.299285	0.172892	0.801627	0.259034	0.131457	0.435453
318	0.00103291	1.84008	0.0319009	0.314383	0.417335	0.65693	0.675439	0.720582
319	0.00103617	1.42009	0.384727	0.252095	0.587055	0.402531	0.858212	0.71085
320	0.00103943	0.871393	0.224742	0.351118	0.478542	0.726878	0.410305	0.446703
321	0.00104269	2.03461	0.536783	0.562273	0.296976	0.215661	0.448766	0.167188
322	0.00104594	0.850454	0.570034	0.371219	0.200143	0.14544	0.472247	0.696621
323	0.0010492	1.59216	0.597385	0.109565	0.173237	0.49301	0.264405	0.955286
324	0.00105246	1.98317	0.508709	0.289895	0.251624	0.248931	0.471587	0.483397
325	0.00105572	1.8121	0.293428	0.523736	0.339126	0.320113	0.202653	0.293107
326	0.00105898	1.71247	0.63404	0.135008	0.879398	0.760475	0.290061	0.449137
327	0.00106224	1.95909	0.267145	0.341367	0.291441	0.280637	0.381801	0.444573
328	0.00106549	2.08466	0.205725	0.677719	0.353383	0.373977	0.5787	0.250474
329	0.00106875	0.722389	0.389197	0.437736	0.229688	0.229089	0.322166	0.251973
330	0.00107201	1.69059	0.269175	0.631754	0.765322	0.265358	0.28563	0.41592
331	0.00107527	1.40504	0.458754	0.188482	0.483606	0.236089	0.0309653	0.368587
332	0.00107853	2.2098	0.453712	0.0927472	0.474125	0.510294	0.246667	0.457866
333	0.00108179	2.15674	0.180697	0.171128	0.344377	0.427974	0.4241	0.23508
334	0.00108504	2.29536	1.0952	0.178166	0.175563	0.135719	0.102782	0.172067
335	0.0010883	2.02203	0.705858	0.347139	0.497738	0.573854	0.650007	0.451706
336	0.00109156	2.20158	0.318385	0.107605	0.563164	0.40373	0.40143	0.195795
337	0.00109482	0.93451	0.491724	0.39832	0.467045	0.159442	0.411709	0.279857
338	0.00109808	2.78558	0.209598	0.402478	0.195017	0.661792	0.259513	0.482108
339	0.00110134	2.47452	0.384398	0.346663	0.532674	0.377343	0.166983	0.402917
340	0.00110459	1.90914	0.559503	0.144464	0.516157	0.328262	0.268264	0.349892
341	0.00110785	1.47452	0.849914	0.457919	0.905432	0.853975	0.184733	0.470182
342	0.00111111	2.23738	0.240403	0.367255	0.520864	0.347508	0.454975	0.281924
343	0.00111437	2.00168	0.744068	0.273719	0.393941	0.261028	0.127578	0.181242
344	0.00111763	1.33777	0.540806	0.0880763	0.759764	0.579465	0.288768	0.478065
345	0.00112089	1.72194	0.354958	0.262679	0.340602	0.822826	0.201554	0.422423
346	0.00112414	1.04643	0.283818	0.444664	0.532269	0.511319	0.254028	0.359782
347	0.0011274	1.14439	0.30471	0.048016	0.33237	0.52392	0.415805	0.26379
348	0.00113066	1.40978	0.611714	0.22321	0.643766	0.684576	0.340858	0.406109
349	0.00113392	1.82233	0.518971	0.469971	0.395436	0.717547	0.084272	0.311763
350	0.00113718	1.24562	0.570794	0.380874	0.445994	0.467763	0.082565	0.167225
351	0.00114044	0.949624	0.519056	0.42908	0.369087	0.427722	0.35464	0.472335
352	0.0011437	1.22708	0.646409	0.44681	0.103521	0.676831	0.0838101	0.638167
353	0.00114695	1.99206	0.229905	0.497722	1.09177	0.298141	0.281635	0.352328
354	0.00115021	2.08439	0.280395	0.240498	0.721013	0.194999	0.0273456	0.358577
355	0.00115347	1.57881	0.258394	0.332322	0.492903	0.663679	0.570316	0.968559
356	0.00115673	1.41276	0.0609892	0.307969	0.343432	0.114462	0.226731	0.386544
357	0.00115999	1.70077	1.50084	0.454561	0.757241	0.146557	0.364368	0.534296
358	0.00116325	1.46442	0.859103	0.1737	0.0395731	0.651537	0.565181	0.220777
359	0.0011665	0.790699	0.381058	0.172308	0.846877	0.628679	0.875231	0.348491
360	0.00116976	2.18829	0.569834	0.412673	0.717353	0.369832	0.563508	0.232644
361	0.00117302	2.36807	0.589148	0.550043	0.121661	0.146068	0.593546	0.548938
362	0.00117628	2.17674	0.733633	0.208911	0.169897	0.575364	0.34752	0.729052
363	0.00117954	2.13458	0.318435	0.0932273	0.434419	0.101114	0.512881	0.550413
364	0.0011828	1.51397	0.713346	0.397386	0.44176	0.209873	0.644629	0.655757
365	0.00118605	1.5087	0.0768203	0.500151	0.424805	0.584699	0.69678	0.407522
366	0.00118931	0.522168	0.417962	0.552065	0.951361	0.319712	0.448739	0.334048
367	0.00119257	2.94537	0.719505	0.20216	0.252953	0.632826	0.593655	0.878222
368	0.00119583	1.55742	0.400306	0.187694	0.716813	0.622639	0.254909	0.904368
369	0.00119909	2.36793	0.851131	0.0313613	0.57722	0.251562	0.477161	0.200084
370	0.00120235	1.37328	0.665507	0.34286	0.484716	0.324393	0.139887	0.59096
371	0.0012056	2.10374	0.496735	0.115374	0.385514	0.665389	0.578193	0.220652
372	0.00120886	2.09445	0.220992	0.524422	0.634807	0.24395	0.369724	0.228178
373	0.00121212	1.97639	0.797634	0.4537	0.595057	0.255601	0.545641	0.405662
374	0.00121538	2.55692	0.526046	0.509493	0.70692	0.783383	0.430592	0.477545
375	0.00121864	2.78915	0.682419	0.249414	0.396797	0.133555	0.452116	0.256734
376	0.0012219	2.47176	0.348713	0.282267	0.693548	0.394361	0.677648	0.240326
377	0.00122515	2.07343	0.315572	0.17782	0.378895	0.464973	1.08753	0.0826092
378	0.00122841	2.52376	0.405154	0.698238	0.43323	0.0597871	0.712372	0.686083
379	0.00123167	1.82349	0.372282	0.416312	0.59501	0.166274	0.708931	0.23151
380	0.00123493	0.572643	0.300989	0.615624	0.286005	0.385389	0.594537	0.289905
381	0.00123819	0.647148	0.0348294	0.431944	0.305925	0.380006	0.564592	0.608339
382	0.00124145	1.10871	0.0980321	0.361398	0.0379403	0.425529	0.434298	0.539735
383	0.00124471	0.874313	1.25449	0.290055	0.232566	0.34962	0.706657	0.159889
384	0.00124796	1.56981	0.480086	0.318268	0.542131	0.0726625	0.417828	0.353565
385	0.00125122	1.29423	0.542295	0.447767	0.170624	0.253818	0.329204	0.268794
386	0.00125448	1.82659	0.435422	0.575471	0.574654	0.924775	0.600576	0.177029
387	0.00125774	1.52873	0.718701	0.42457	0.431157	0.69298	0.273748	0.368076
388	0.001261	1.24588	0.25965	0.493736	0.23821	0.299974	0.677096	0.779791
389	0.00126426	0.576987	0.329417	0.278221	1.24796	0.32923	0.503832	0.489076
390	0.00126751	1.60202	0.937898	0.398324	0.305237	0.548139	0.877713	0.2408
391	0.00127077	1.14102	0.155791	0.643464	0.400221	0.685254	0.496623	0.573968
392	0.00127403	2.1861	0.257621	0.312708	0.660696	0.0863628	0.592057	0.629163
393	0.00127729	1.94198	0.423343	0.413663	0.203786	0.12191	0.176912	0.401682
394	0.00128055	1.96795	0.622271	0.493259	0.332312	0.7911	0.659806	0.322087
395	0.00128381	1.5844	0.118337	0.46255	0.177213	0.691128	0.515392	0.653057
396	0.00128706	1.15738	0.263588	0.333378	0.290657	0.35192	0.481944	0.160744
397	0.00129032	1.31132	0.711064	0.245789	0.271822	0.283437	0.211342	0.482585
398	0.00129358	1.62418	0.324222	0.289094	0.169579	0.617551	0.759373	0.540509
399	0.00129684	2.27273	0.123072	0.142152	0.646312	0.379793	0.072204	0.415341
400	0.0013001	1.11351	0.19706	0.29221	0.90479	0.0732903	0.620449	0.278209
401	0.00130336	1.84358	0.69993	0.27847	0.246018	0.399028	0.448715	0.21999
402	0.00130661	0.435097	0.0984849	0.506439	0.104136	0.49925	0.315979	0.298304
403	0.00130987	0.596223	0.311007	0.45874	0.323196	0.0789453	0.505	0.175497
404	0.00131313	0.878893	1.12072	0.222961	0.290119	0.621473	0.58143	0.540381
405	0.00131639	2.22865	0.151442	0.628281	0.518387	0.208868	0.48159	0.311245
406	0.00131965	2.29495	0.696176	0.262144	0.141188	0.365795	0.966021	0.46464
407	0.00132291	1.59831	0.939122	0.32715	0.211049	0.532699	0.671832	0.617351
408	0.00132616	1.26619	0.732302	0.218525	0.332132	0.201555	0.337393	0.623394
409	0.00132942	2.82853	0.432511	0.243223	0.199105	0.309126	0.829979	0.613911
410	0.00133268	2.95911	1.03815	0.198549	0.346367	0.569933	0.865565	0.530442
411	0.00133594	0.841453	0.722467	0.448657	0.407765	0.656162	0.391227	0.397403
412	0.0013392	1.23481	0.272755	0.23268	0.308306	0.23523	0.726297	0.347498
413	0.00134246	1.39282	0.0675758	0.51957	1.02558	0.208844	0.826514	0.560689
414	0.00134572	1.77385	0.432593	0.190951	0.15938	0.373642	0.547737	0.17196
415	0.00134897	1.08879	0.755183	0.318559	0.538517	0.569854	0.212197	0.150859
416	0.00135223	1.47487	0.14113	0.359354	0.528514	0.608267	0.616771	0.291486
417	0.00135549	1.13911	0.272534	0.437521	0.84009	0.398165	0.509718	0.521636
418	0.00135875	1.67303	0.213426	0.185214	0.297258	0.707958	0.424665	0.41975
419	0.00136201	1.41044	0.0849247	0.121337	0.235476	0.162118	0.344993	0.551545
420	0.00136527	0.128288	0.449852	0.364102	0.387564	0.25944	0.22471	0.419393
421	0.00136852	1.6476	0.568691	0.483712	0.288001	0.709032	0.231233	0.446085
422	0.00137178	1.1206	0.211601	0.577787	0.414381	0.488627	0.590414	0.152163
423	0.00137504	1.00028	0.03852	0.253846	0.856305	0.316667	0.140554	0.536194
424	0.0013783	1.71521	0.250443	0.439941	0.469606	0.562649	0.23123	0.201271
425	0.00138156	1.56143	0.325458	0.73888	0.53683	0.216579	0.609659	0.435084
426	0.00138482	1.93652	0.902062	0.322464	0.361564	0.362069	0.585509	0.430068
427	0.00138807	1.25008	1.21335	0.0942434	0.40876	0.804248	0.162732	0.329149
428	0.00139133	1.30299	0.618758	0.309677	0.643551	0.459043	0.239223	0.485347
429	0.00139459	1.95893	0.63817	0.65178	0.263324	0.468357	0.282759	0.392205
430	0.00139785	1.66451	0.670604	0.515918	0.362877	0.228416	0.821885	0.130858
431	0.00140111	0.861165	0.58004	0.589442	0.523266	0.301919	0.418606	0.392238
432	0.00140437	1.90248	0.0591616	0.403945	0.323513	0.344078	0.235763	0.493448
433	0.00140762	1.34872	0.394524	0.0976758	0.607947	0.439468	0.271821	0.169765
434	0.00141088	1.40783	0.498995	0.252359	0.407383	0.479432	0.339541	0.301096
435	0.00141414	1.93211	0.131395	0.16569	0.435272	0.486307	0.480598	0.34105
436	0.0014174	1.12645	0.155808	0.397167	0.213052	0.232382	0.435929	0.543238
437	0.00142066	1.2765	0.644897	0.724232	0.574405	0.566435	0.831737	0.25498
438	0.00142392	0.615511	0.204511	0.405482	0.549716	0.447404	0.56991	0.744105
439	0.00142718	0.562957	0.522189	0.236792	0.665121	0.197693	0.533732	0.0551784
440	0.00143043	1.47137	0.520588	0.295052	0.987393	0.229637	0.714042	0.145182
441	0.00143369	2.11813	0.28467	0.29434	0.446206	0.635479	0.72681	0.588522
442	0.00143695	1.63005	0.321863	0.429694	0.639354	0.243504	0.133797	0.370837
443	0.00144021	1.26349	0.457119	0.560326	0.155975	0.172673	0.450695	0.41978
444	0.00144347	1.39525	0.990981	0.0587666	0.0330582	0.593118	0.387808	0.322468
445	0.00144673	0.342502	0.135679	0.250539	0.282872	0.352226	0.207892	0.432397
446	0.00144998	1.1044	0.379327	0.739738	0.277913	0.500851	0.0910339	0.310785
447	0.00145324	0.25672	0.763952	0.0985813	0.268759	0.589804	0.451468	0.273769
448	0.0014565	2.57786	0.515958	0.634767	0.738209	0.309913	0.676158	0.598798
449	0.00145976	0.821993	0.583998	0.501713	0.360681	0.0951041	0.298465	0.552162
450	0.00146302	1.4498	0.412948	0.384538	0.326573	0.322289	0.306663	0.422498
451	0.00146628	1.48686	0.602849	0.319675	0.363713	0.146928	0.245022	0.449904
452	0.00146953	1.52959	0.641155	0.25477	0.288508	0.474737	0.0968739	0.429358
453	0.00147279	1.38928	0.670698	0.311973	0.499492	0.280351	0.329806	0.177599
454	0.00147605	1.74789	0.386642	0.12032	0.350696	0.440566	0.316529	0.272209
455	0.00147931	1.73547	0.328243	0.440311	0.719382	0.520168	0.641248	0.109883
456	0.00148257	1.60585	0.10069	0.662395	0.25356	0.550357	0.0952054	0.958152
457	0.00148583	1.14991	0.465203	0.470485	0.151579	0.400552	0.58531	0.208597
458	0.00148908	1.21807	0.255514	0.632684	0.546647	0.0801831	0.181948	0.535336
459	0.00149234	1.23961	0.338723	0.577204	0.526073	0.603905	0.270429	0.414735
460	0.0014956	0.882236	0.632175	0.325163	0.157769	0.289413	0.23891	0.311776
461	0.00149886	0.895598	0.514528	0.397359	0.468711	0.111013	0.21474	0.413684
462	0.00150212	2.43037	0.309092	0.317115	0.328208	0.424126	0.540991	0.825282
463	0.00150538	1.48083	0.856171	0.212033	0.722434	0.627644	0.0995047	0.142121
464	0.00150863	0.435144	0.294163	0.747613	0.355212	0.29946	0.237821	0.373902
465	0.00151189	2.23793	0.379921	0.588015	0.266454	0.255886	0.392243	0.241534
466	0.00151515	0.51042	0.271418	0.102232	0.473849	0.403937	0.302871	0.367948
467	0.00151841	0.86335	0.814381	0.532198	0.351943	0.363395	0.927003	0.725076
468	0.00152167	1.76356	0.419556	0.282488	0.152741	0.24404	0.608621	0.233295
469	0.00152493	0.894591	0.48314	0.449793	0.350676	0.319368	0.155742	0.442718
470	0.00152819	1.53697	0.18564	0.421912	0.667748	0.137674	0.256557	0.26493
471	0.00153144	1.27098	0.265717	0.109159	0.237198	0.313984	0.183328	0.0862559
472	0.0015347	1.37123	0.250505	0.301637	0.499705	0.287398	0.562633	0.139331
473	0.00153796	0.769924	0.294407	0.290857	0.402126	0.363267	0.126914	0.608425
474	0.00154122	0.719929	0.614351	0.183899	0.367061	0.578532	0.289878	0.365022
475	0.00154448	2.37638	0.493801	0.303212	0.106944	0.571456	0.544578	0.122084
476	0.00154774	1.46419	0.296395	0.177458	0.289654	0.223927	0.470995	0.519784
477	0.00155099	2.2149	0.375208	0.10902	0.167015	0.243464	0.358182	0.242158
478	0.00155425	1.95828	1.15753	0.0624496	0.437312	0.174588	0.370284	0.324043
479	0.00155751	1.07749	0.482648	0.145043	0.307454	0.648406	0.762431	0.28137
480	0.00156077	1.10104	0.695138	0.22086	0.385416	0.00731574	0.320913	0.906961
481	0.00156403	0.494946	0.762514	0.219114	0.609923	0.4943	0.556818	0.740502
482	0.00156729	1.43331	0.452842	0.081723	0.655077	0.795674	0.270397	0.300869
483	0.00157054	1.16778	0.228852	0.156857	0.250874	0.646228	0.306418	0.210211
484	0.0015738	1.80063	0.497737	0.420663	0.198021	0.504973	0.436743	0.342692
485	0.00157706	1.05608	0.486605	0.224556	0.121281	0.290451	1.04835	0.0900276
486	0.00158032	0.485213	0.156855	0.473668	0.183198	0.370669	0.255465	0.458244
487	0.00158358	0.569421	0.575776	0.272014	0.44557	0.0677709	0.125012	0.29282
488	0.00158684	0.820395	0.519875	0.09	0.15961	0.803281	0.246677	0.67735
489	0.00159009	0.696119	0.221596	0.207926	0.381324	0.121125	0.152339	0.235614
490	0.00159335	2.26199	0.538699	0.53814	0.65501	0.103537	0.624414	0.0795477
491	0.00159661	1.51921	0.284407	0.306367	0.351688	0.658296	0.300013	0.528869
492	0.00159987	0.57771	0.272167	0.769376	0.246987	0.208105	0.222055	0.288793
493	0.00160313	1.45974	0.844827	0.321509	0.397325	0.141521	0.169371	0.630758
494	0.00160639	2.00699	1.02678	0.471128	0.442274	0.191325	0.422084	0.181155
495	0.00160964	0.723537	0.343639	0.464597	0.477607	0.348507	0.158831	0.405039
496	0.0016129	1.7137	0.458884	0.0329211	0.132266	0.099703	0.225312	0.444185
497	0.00161616	0.396776	0.653596	0.166899	0.183295	0.332395	0.517293	0.381693
498	0.00161942	1.69473	0.301762	0.439247	0.913145	0.447576	0.382977	0.487014
499	0.00162268	1.12929	0.728381	0.376215	0.0897653	0.579361	0.697041	0.251864
500	0.00162594	0.936028	0.17204	0.458761	0.222899	0.32324	0.13637	0.760753
501	0.0016292	0.173183	1.1096	0.677566	0.450491	0.334714	0.27056	0.490515
502	0.00163245	0.829888	0.732778	0.316037	0.0510571	0.329087	0.330177	0.729632
503	0.00163571	1.21514	0.552709	0.105778	0.481142	0.365028	0.506002	0.0474436
504	0.00163897	1.30317	0.599792	0.578395	0.219309	0.298784	0.505871	0.503662
505	0.00164223	1.23703	0.772712	0.475054	0.347173	0.571996	0.402548	0.659918
506	0.00164549	0.486263	0.366544	0.48119	0.289081	0.298845	0.142723	0.575113
507	0.00164875	1.1565	0.134214	0.397781	0.553951	0.337936	0.410106	0.340234
508	0.001652	1.04395	0.408716	0.135356	0.358571	0.573974	0.258944	0.192718
509	0.00165526	0.772417	0.536975	0.367293	0.273597	0.115707	0.559599	0.191946
510	0.00165852	0.778718	0.466988	0.319251	0.297361	0.441658	0.213298	0.371214
511	0.00166178	0.427895	0.191373	0.574957	0.517688	0.3536	0.27368	0.273566
512	0.00166504	0.345864	0.546527	0.180892	0.542847	0.196399	0.451841	0.369643
